1 **Transcriptomic Signatures for Ovulation in Vertebrates**

2 Dongteng Liu<sup>1,2</sup>, Michael S. Brewer<sup>2</sup>, Shixi Chen<sup>1</sup>, Wanshu Hong<sup>1</sup>, and Yong Zhu<sup>1,2</sup>

3 1. State Key Laboratory of Marine Environmental Science, College of Ocean and Earth Sciences, Xiamen  
4 University, Xiamen, Fujian Province 361102, People's Republic of China

5 2. Department of Biology, East Carolina University, Greenville, NC 27858, United States of America

6

7 Running title: Transcriptomic Signatures for Ovulation

8

9 Key words: ovulation, transcriptomics, Pgr, knockout, RNA-Seq, TALENs, zebrafish, follicles

10

11

12 Correspondence: Yong Zhu, Department of Biology, East Carolina University, Greenville, NC 27858, USA.

13 e-mail: zhuy@ecu.edu

## 14 **Abstract**

15 Recently, we found anovulation in nuclear progesterin receptor (Pgr) knockout (Pgr-KO) zebrafish,  
16 which offers a new model for examining Pgr regulated genes and pathways that are important for  
17 ovulation and fertility. In this study, we examined expression of all transcripts using RNA-Seq in  
18 pre-ovulatory follicular cells collected after the final oocyte maturation, but prior to ovulation,  
19 from wild-type (WT) or Pgr-KO fish. Differential expression analysis revealed 2,888 genes  
20 significantly differentially expressed between WT and Pgr-KO fish. Among those, 1,230 gene  
21 transcripts were significantly more expressed, while 1,658 genes were significantly less expressed  
22 in WT than those in Pgr-KO. We then retrieved and compared transcriptional data from online  
23 databases and further identified 661 conserved genes in fish, mice, and humans, that showed  
24 similar levels of high (283 genes) or low (387) expression in animals that were ovulating compared  
25 to those with no ovulation. For the first time, ovulatory genes and their involved biological  
26 processes and pathways were also visualized using Enrichment Map and Cytoscape. Intriguingly,  
27 enrichment analysis indicated the genes with higher expression were involved in multiple  
28 ovulatory pathways and processes such as inflammatory response, angiogenesis, cytokine  
29 production, cell migration, chemotaxis, MAPK, focal adhesion, and cytoskeleton reorganization.  
30 In contrast, the genes with lower expression were mainly involved DNA replication, DNA repair,  
31 DNA methylation, RNA processing, telomere maintenance, spindle assembling, nuclear acid  
32 transport, catabolic processes, nuclear and cell division. Our results indicate that a large set of  
33 genes (>3,000) are differentially regulated in the follicular cells in zebrafish prior to ovulation,  
34 terminating programs including growth and proliferation, and beginning processes including the  
35 inflammatory response and apoptosis. Further studies are required to establish relationships among  
36 these genes and an ovulatory circuit in zebrafish model.

## 37 **Introduction**

38 Ovulation is a physiological process that releases a fertilizable oocyte from follicular cells and is  
39 an essential reproductive event for the preservation of a species. It is well established that  
40 luteinizing hormone (LH) initiates a cascade of signaling; including upregulation of progesterone and  
41 its nuclear progesterone receptor (PGR) which activates various downstream targets and signaling  
42 pathways, eventually leading to follicular rupture. However, our understanding of the molecular  
43 mechanisms that control ovulation is far from complete. For example, there is limited evidence of  
44 downstream targets and signaling pathways that PGR regulates. A few genome-wide transcriptome  
45 analyses of differentially expressed genes in the follicular cells of pre-ovulatory oocytes suggest  
46 conserved gene expression regulation in humans, macaques, and mice [1-3]. To our knowledge,  
47 there are no published transcriptomic analyses of gene expression focusing on the follicular cells  
48 of pre-ovulatory oocytes in basal vertebrate; all studies conducted so far have not separated  
49 follicular cells from the oocytes, or used mixed stages of oocytes that preclude detailed  
50 comparisons between different species [4-6].

51 Zebrafish is an alternative vertebrate model for studying gene function, signaling pathways in  
52 development, and various physiological processes because of their low cost, rapid development,  
53 and relative simplicity. Unlike mammalian models, zebrafish release and fertilize mature oocytes  
54 outside the body, developing their embryos externally. Because embryos develop externally,  
55 females do not undergo cumulus-oocytes complex (COC) expansion, luteinization, or implantation  
56 processes that happen concurrently or subsequently with ovulation, making it relatively easy to  
57 distinguish genes exclusively involved in ovulation [7]. In addition, follicular cell layers can be  
58 collected separately from pre-ovulatory oocytes, which are relative large (>600  $\mu\text{m}$ ), for  
59 biochemical and molecular analyses [8]. Our recent study has also shown that Pgr is an important

60 transcription factor induced by luteinizing hormone (LH), and is essential for ovulation in  
61 zebrafish [9]. In Pgr knockout (Pgr-KO) female zebrafish mature oocytes are trapped within  
62 follicular cells unable to ovulate, leading to infertility. Our results are consistent with the complete  
63 anovulatory and infertile phenotype reported in PGR-KO mice [9, 10]. These results prompted us  
64 to hypothesize that ovulation is controlled by conserved genes and signaling pathways in  
65 vertebrates.

66 In this study, we first conducted a genome-wide differential gene expression analysis in the  
67 follicular cells of pre-ovulatory oocytes from wildtype (WT) in comparison to Pgr-KO zebrafish  
68 using RNA-Seq and bioinformatics tools. We hypothesize that gene expression changes in WT  
69 would be important for ovulation, while lack of changes in Pgr-KO due to anovulation could serve  
70 as reference. We then conducted a comparison analysis of genome-wide differentially regulated  
71 genes in the follicular cells of pre-ovulatory oocytes of three key vertebrate species, i.e., zebrafish,  
72 mouse, and human. We found that Pgr regulates a network of conserved signaling pathways,  
73 biological processes, and genes that control ovulation. Dramatic differences in the expression  
74 between WT and Pgr-KO of various genes include *ptgs2* (prostaglandin-endoperoxide synthase  
75 2a, 2b), *runx1* (runt-related transcription factor 1), *ptger4b* (prostaglandin E receptor 4b), *rgs2*  
76 (regulator of G-protein signaling 2), and *adamts9* (a disintegrin-like and metalloproteinase with  
77 thrombospondin motifs). This differential expression across species provides a list of candidate  
78 genes to study the molecular mechanisms underlying ovulation.

79

## 80 **Materials and Methods**

### 81 **Zebrafish husbandry**

82           Generation and characterization of Pgr mutant lines have been described previously [9]. The  
83   WT zebrafish used in this study was a Tübingen strain initially obtained from the Zebrafish  
84   International Resource Center and propagated in our lab according to the following procedure.  
85   Fish were kept at constant water temperature (28<sup>0</sup>C), a photoperiod of 14hrs of light with 10 hrs  
86   of dark (lights on 9:00, lights off at 23:00), pH at 7.2, and salinity conductivity from 500-1200  $\mu$ S  
87   in automatically controlled zebrafish rearing systems (Aquatic Habitats Z-Hab Duo systems,  
88   Florida, USA). Fish were fed three times daily to satiation with a commercial food (Otohime B2,  
89   Reed Mariculture, CA, USA) containing high protein content and supplemented with newly  
90   hatched artemia (Brine Shrimp Direct, Utah, USA). The Institutional Animal Care and Use  
91   Committee (IACUC) at East Carolina University approved experimental protocols.

#### 92   **Collection of pre-ovulatory follicular cell layers**

93           Follicular cells of pre-ovulatory oocytes were collected from three WT or three Pgr-KO  
94   female zebrafish at the same developmental stage, i.e., immediate after oocyte maturation but prior  
95   to ovulation (See Fig.1 for detail). We limited our sample size to n=3 for each group, to balance  
96   high cost of RNA-seq and minimum requirement of statistical analyses. Follicular cells are two  
97   thin layers of cells (<4  $\mu$ m in thickness) containing theca and granulosa cells, surrounding a  
98   gigantic oocyte in zebrafish ( $\varnothing$ >600  $\mu$ m for pre-ovulatory oocyte, Fig.1). Follicular cells could be  
99   physically separated from oocytes [8], which typically have approximate 1000 fold higher amount  
100   of total RNAs than those in surrounding follicular cells. However, physical separation of granulosa  
101   cells from theca cells is impractical due to small cell size and no distinguishable physical properties  
102   of these two cell types.

103           All the fish used in the experiment were approximately four months old. Individual, well-fed,  
104   mature, and healthy female zebrafish were housed separately from male fish by a middle divider

105 in a spawning tank the night before sampling. Oocyte maturation and ovulation were synchronized  
106 between different individuals, and spawning typically happened within 30 minutes once the lights  
107 switched on and the middle divider was removed from these well-fed and individually housed fish.  
108 To obtain pre-ovulatory oocytes, ovaries were removed within an hour before the lights turned on  
109 in the morning following an appropriate anesthetic overdose (MS-222: 200 mg/L in buffered  
110 solution). Excised individual ovary was then placed in a zebrafish Ringer's solution (116mM NaCl,  
111 2.9mM KCl, 1.8mM CaCl<sub>2</sub>, 5mM HEPES, pH 7.2) and examined under a dissecting microscope.  
112 Ovaries containing healthy pre-ovulatory follicles that had a translucent appearance, indicating the  
113 completion of oocyte maturation and proximal to ovulation, were selected (Fig.1). Ovaries with  
114 no pre-ovulatory oocytes, incomplete absorption of previous left-over matured oocytes, or  
115 unhealthy oocytes that were morphologically distinct from healthy pre-ovulatory oocytes were  
116 discard. Individual, follicle-enclosed, healthy mature oocytes were teased away from immature  
117 oocytes by gently pipetting in and out several times using a Pasteur pipette. To determine cell  
118 specific changes of transcripts regulated by Pgr in the follicular cells, we manually peeled follicular  
119 cells off pre-ovulatory oocytes in zebrafish Ringers' solution under a dissecting microscope using  
120 a pair of fine, clean glass needles as described previously [8]. Follicular cells were collected into  
121 a 1.7ml microcentrifuge tube and homogenized immediately in a 300 µl TRIzol solution by a  
122 sonicator (Sonic Dismembrator, Fisher Scientific, Pittsburgh, PA, USA). Samples were stored in  
123 -80 °C freezer until RNA extraction. Each sample contained follicular cell layers separated  
124 carefully from 45 to 130 pre-ovulatory oocytes of one fish. The process for collecting one sample  
125 was limited to less than an hour, avoiding significant degradation or changes of the transcripts  
126 (unpublished data). We collected six samples in six different days, in order to sample at same time  
127 point and same developmental stages.

## 128 **RNA isolation**

129 Total RNA was extracted using TRIzol and a Qiagen RNeasy kit according to a modified  
130 protocol. An equal volume of cold 100% ethanol was added into the aqueous phase of the solution  
131 following phase separation TRIzol. Samples were then loaded onto an RNeasy spin column,  
132 centrifuged (8,000g, 30 seconds), washed once with 700  $\mu$ l RW1, twice with 500  $\mu$ l RPE washing  
133 buffer, and eluted in 25  $\mu$ l of RNase free water according to Qiagen's instructions. The  
134 approximate concentration and purity of samples were examined using a Nanodrop 2000  
135 Spectrophotometer. An aliquot of RNA sample with OD 260/280 > 1.8 and OD 260/230 > 1.6 was  
136 used for RNA-Seq analysis and the remainder was used for quantitative real-time PCR (qPCR)  
137 assay.

## 138 **Library construction and Illumina sequencing**

139 RNA-Seq library preparation and high-throughput NGS sequencing was carried out at  
140 HudsonAlpha Genomic Services Lab (Huntsville, AL). Qubit® 3.0 Fluorometer and Agilent 2100  
141 Bioanalyzer further examined the concentration and integrity of total RNA samples prior to library  
142 construction. About 800ng of total RNA was used to construct a cDNA library according to a  
143 protocol of Illumina TruSeq RNA Sample Preparation Kit (Illumina). Ribosomal reduction was  
144 used to remove non-coding rRNA. The library was then PCR amplified with 15 cycles using  
145 TruSeq indexes adaptor primers, submitted for Kapa quantification and dilution, and sequenced  
146 with a single end read (50bp) on an Illumina HiSeq 2000 instrument.

## 147 **Genome mapping and differential expression analysis**

148 The quality control and adaptor trimming of raw FastQ files were performed using  
149 Trim\_Galore. Trimmed raw files were inspected using FastQC. The entire zebrafish genome  
150 sequence (version GRCz10) was downloaded from Ensembl, and the alignment of sequence reads

151 to the zebrafish genome was carried out using STAR aligner [11]. Binning of sequencing reads to  
152 genes/exons was accomplished by HTseq-count, where reads with an alignment score of less than  
153 10 were skipped [12]. DESeq2, a popular Bioconductor package with over 3000 citations, was  
154 chosen to normalize the raw counts with respect to the gene length and sequencing depth as well  
155 as identify differentially expressed genes [13].

### 156 **Validation of differential expression by quantitative real-time PCR (qPCR)**

157 Twenty-three of the differentially expressed genes were selected, and their expressions were  
158 further validated using traditional qPCR. Briefly, 250 ng of total RNA from a subset of samples  
159 that were used for transcriptomic analysis, were reverse transcribed using SuperScript III Reverse  
160 Transcriptase in a 10  $\mu$ l reaction volume following the manufacturer's instructions (Invitrogen,  
161 Carlsbad, CA). Specific PCR primer pairs (supplemental Table S1) for target genes were designed  
162 as close as possible to stop codon to detect transcripts without five-prime caps, and spanning at  
163 least two adjacent exons to avoid genomic DNA interference. Glyceraldehyde-3-phosphate  
164 dehydrogenase (*gapdhs*) was chosen as an internal control for qPCR because *gapdhs* was  
165 expressed evenly among all samples in RNA-Seq analysis. Absolute copy numbers of each  
166 transcript were calculated from a standard curve generated from a serial dilution of plasmid DNA  
167 with known concentrations [8]. Then, the expression of each transcript was normalized with  
168 *gapdhs* and expressed as fold changes by comparing WT to knockout ( $\log_2$  (WT/Pgr-KO)), since  
169 genes important for ovulation would change significantly in WT, but would not be changed in Pgr-  
170 KO.

### 171 **Comparison of genes that are important for ovulation in human, mouse and zebrafish**

172 Human (E-MTAB-2203) and mouse (GSE4260) [1, 3] transcriptomic data sets, that were  
173 focused on differentially regulated genes in the follicular cells of preovulatory oocytes were



174 downloaded from EMBL and GEO databases, respectively. Two important marker genes,  
175 LHCGR and PGR, were both found in these two data sets. Therefore, both human and mice  
176 samples contain granulosa cells, and are comparable to the follicular cells of zebrafish.

177 Multiple CEL data files that containing human transcripts were first imported into  
178 Expression Console software (Affymetrix) for data normalization, then, the robust Multi-array  
179 Average (RMA) normalized our data and were transferred into Transcriptome Analysis Console  
180 program (v3.0, Affymetrix) for differential expression analysis using One-Way Repeated  
181 Measure ANOVA (paired). We used the R packages Affy [14] and limma [15] for differential  
182 expression analysis, due to only two biological replicates in mice samples.

183 Differentially expressed genes are defined as having a minimal 2 fold difference in the  
184 expression of the transcript observed in treated or mutant samples, compared to controls (absolute  
185  $\log_2\text{FoldChange} > 1$ ) with a corrected FDR p-value  $< 0.05$ . Ensembl gene IDs of human and  
186 zebrafish were converted to the mouse version to determine ovulatory genes that are conserved  
187 between human, mice, and zebrafish.

### 188 **Enrichment analysis**

189 The Enrichment Map plugin for Cytoscape [16] was used to visualize the results of enriched  
190 gene sets and pathways due to Pgr-KO. Both up-regulated and down-regulated genes were first  
191 imported into the online g:Profiler (<http://biit.cs.ut.ee/gprofiler/>). We selected the “no filtering”  
192 option and kept gene sets that had three or more genes that were significantly differentially  
193 expressed for follow-up analyses. These gene sets were further compiled using KEGG, Reactome,  
194 and GO databases. Enriched gene sets were then loaded into the Enrichment Map plugin for  
195 Cytoscape using a p-value cutoff at 0.0005 to achieve an operable clustered network. The resulting  
196 network map was curated manually by removing uninformative gene sets and grouping

197 functionally related gene sets together. We then labeled these functional groups to highlight  
198 prevalent biological functions that were enriched.

### 199 **Statistical analysis**

200 Differences in expression between Pgr-KO and WT data were analyzed using Students' t-  
201 test, with p-values < 0.05 considered to be significant.

## 202 **Results**

### 203 **A large set of genes (>10%) are differentially regulated prior to ovulation**

204 Global gene expression in Pgr-KOs showed a significant difference and clustered distinctly  
205 from those in WT (Figs.2 & 3). Variation in gene expression among three different Pgr-KO fish  
206 were much smaller than those in WT (Figs.2 & 3), indicating that Pgr is a key transcriptional  
207 regulator, and knocking out Pgr blocks the changes of gene expression critical for ovulation.  
208 Variable increases between WT samples suggest that gene expression changed dramatically prior  
209 to ovulation, or small sample size.

210 We found that 3,569 zebrafish genes are expressed significantly different in WT compared to  
211 those in Pgr-KO, using a cutoff of fold changes  $\geq 2$  and adjusted p-values  $\leq 0.05$  (Table S2). We  
212 retained 2,888 significantly regulated zebrafish genes that have mouse homologs for subsequent  
213 analyses; and removed duplicates with less significance (Table S3). We did this to reduce the  
214 complexity caused by teleost specific gene duplication, and to search for conserved genes in  
215 vertebrates. Among these differentially regulated genes, 1,230 genes had higher expression and  
216 1,658 genes had lower expression in WT than in Pgr-KO. Intriguingly, among the top 200  
217 differentially expressed genes ranked by their adjusted p-value, 178 (89%) had significantly higher  
218 levels of expression in WT than in Pgr-KO (Fig.4). They also exhibited large differences in  
219 expression, with 154 genes ranging eight to 147 fold. In contrast, only 16 genes among the top 200

220 had more than an eight fold decrease in WT than in Pgr-KO (TABLE S4). These results suggest  
221 dramatic changes in gene expression, especially increase of expression was critical for ovulation  
222 to proceed, which was also likely cause of variations among WT samples.

### 223 **RNA-Seq results confirmed by qRT-PCR**

224 The specificities of each PCR primer set used in qPCR was confirmed using a melting curve  
225 analysis and by sequencing the PCR products. Similar differences were obtained in the gene  
226 expression for 23 selected genes in qPCR analysis and RNA-Seq of WT samples compared to Pgr-  
227 KO (Fig.5).

### 228 **Pgr is essential for regulating downstream targets that are important for ovulation**

229 In total, 1,962 gene sets were enriched significantly ( $p \leq 0.05$ ) when all up-regulated genes, i.e.,  
230 1,230 corresponding mouse homolog IDs in WT fish were input into g:Profiler. A small 943 gene  
231 sets were enriched when all down-regulated genes, i.e., 1,658 mouse homolog IDs, were input into  
232 the same program. We retained 649 upregulated gene sets and 469 down-regulated gene sets, with  
233 a more stringent cutoff at  $p \leq 0.0005$ , to draw better and less congested enrichment maps.

234 Multiple sets of genes, signaling pathways, and biological processes important for ovulation  
235 had significantly higher expression in WT compared to those in Pgr-KO. These enriched biological  
236 processes in WT include: angiogenesis, cell migration, chemotaxis, focal adhesion, response to  
237 growth factor, vasodilation, blood coagulation, cytokine production, inflammatory response,  
238 leukocyte aggregation and differentiation, cytoskeleton reorganization, extracellular matrix  
239 organization, response to hypoxia, and apoptosis (Fig.6A). The enriched KEGG or Reactome  
240 pathways in WT include: MAPK signaling, Wnt signaling, ERBB signaling, PI3K-Akt signaling,  
241 and NF-kappaB signaling (Fig.6A). In contrast, biological processes enriched in the WT down-  
242 regulated gene sets were mainly related to cell growth, proliferation, and cell cycle instead of

243 ovulation [3]. These processes include: DNA replication, DNA repair, DNA methylation, cell  
244 phase transition, and cell division (Fig.6B). The clear distinction between up- and down-regulated  
245 genes in WT compared to Pgr-KO demonstrates that Pgr is essential for determining the cell fate  
246 and transition of pre-ovulatory follicular cells. A lack of Pgr would block the biological processes  
247 and signaling pathways required for ovulation.

248 **Conserved biological processes and pathways that are important for ovulation in human,**  
249 **mouse and zebrafish.**

250 Currently, Pgr-KO models are limited. Other than zebrafish, there is only one data file, containing  
251 no-biological replicates for a PGR-KO mouse and used whole ovaries, which could not be  
252 analyzed appropriately [17]. In order to further examine conserved genes and biological processes  
253 important for ovulation, we compared our RNA-Seq data with transcriptomic data obtained from  
254 HCG induced ovulation samples in humans [3] and mice [1]. In follicular cell samples of human  
255 treated with HCG, 852 genes were significantly up-regulated and 884 were down-regulated when  
256 compared to those without HCG treatment. Whereas, in mouse follicular cell samples treated with  
257 HCG, 1,356 genes were significantly up-regulated and 1,553 were significantly down-regulated  
258 compared to those without HCG exposure. We focused on analyzing genes that showed similar  
259 increases or decreases between zebrafish and mammals (human and/or mouse), and found 283 up-  
260 regulated genes and 378 down-regulated genes in WT that are conserved (Fig.7). The features of  
261 these three datasets are summarized in Table 1.

262 Enrichment analysis of the conserved 283 up-regulated or 378 down-regulated genes show  
263 two distinct pathways (Fig.6). The first pathway was related to ovulation including angiogenesis,  
264 cell migration, cytokine production, inflammatory response, MAPK/JNK cascade, and cell-  
265 specific apoptosis. The second was related to cell growth and proliferation, including DNA repair,

266 DNA replication, chromatin modification, nuclear division, and cell cycle checkpoint (Fig.8). Our  
267 analysis indicates that these genes and biological processes for ovulation are highly conserved  
268 among vertebrates.

### 269 **Representative genes and processes that may be important for ovulation**

270 Some of the genes and processes conserved in our cross-species comparison (Fig.8), or  
271 suggested to be important for ovulation are highlighted below (Table.2).

272 *Inflammatory response.* Several inflammation-associated gene transcripts were more expressed in  
273 WT compared to those in Pgr-KO zebrafish, and higher in mice and human samples treated with  
274 HCG. Several of these genes are critical for ovulation. For example, *runx1* (runt related  
275 transcription factor 1), *ptgs2* (prostaglandin-endoperoxide synthase 2), and *pla2g4a*  
276 (phospholipase A2 group IVA) are important for prostaglandin synthesis and ovulation. Genes  
277 involved in il6 signaling include *socs3* (suppressor of cytokine signaling 3), and *mcl1* (myeloid  
278 cell leukemia sequence 1), which were also expressed significantly higher in WT compared to Pgr-  
279 KO fish. *Zbtb16* (zinc finger and BTB domain containing 16), *adam8* (a disintegrin and  
280 metalloproteinase domain 8) and *ptger4* (prostaglandin E receptor 4), which were also expressed  
281 significantly higher in WT compared to Pgr-KO. Intriguingly, *tnfrsf21* (tumor necrosis factor  
282 receptor superfamily, member 21) and *furin* (paired basic amino acid cleaving enzyme) transcripts  
283 were also expressed more in WT than Pgr-KO.

284 *Vascularization.* Genes involved in coagulation and angiogenesis including *F3*, *F5* (coagulation  
285 factors F3 and F5), and plasminogen activator inhibitor *serpine1* (serine peptidase inhibitor clade  
286 E member 1) were expressed significantly higher in WT compared to those in Pgr-KO. Notably,  
287 the expression levels of *rgs2* (regulator of G-protein signaling 2) encoding a member of GTPase  
288 activating proteins, and *nrp1* (neuropilin 1) encoding a protein that has been shown to interact with

289 VEGFA (vascular endothelial growth factor A), were both expressed significantly higher in all  
290 three species prior to ovulation in WT.

291 *Extracellular matrix remodeling.* Extracellular matrix disassociation is an essential step for follicle  
292 rupture. Surprisingly, transcripts of *adamts1* (a disintegrin-like and metallopeptidase with  
293 thrombospondin type 1 motif 1), suggested to play a key role in mammalian COC expansion  
294 leading to follicular rupture [18], was undetectable in zebrafish follicular cells in both RNA-Seq  
295 and qPCR analyses though *adamts1* was highly expressed in other cell types including follicles in  
296 earlier stages (unpublished). Instead, another member of Adamts family, *adamts9*, was found to  
297 be up-regulated 60 fold in WT samples compared to Pgr-KO.

298 *Cell cycle.* Most of cell cycle related genes (14 out 19) were up-regulated in Pgr-KO, but during  
299 onset of ovulation in WTs were significantly down-regulated. Similar trends of decrease or  
300 increase were observed in all three species. These genes include several cyclins (*ccnb2*, *ccna2*, and  
301 *ccnb1*), cyclin-dependent kinases (*cdk1* and *cdk2*), a cell proliferation marker (*mki67*), several  
302 mini-chromosome maintenance proteins (*mcm3*, *mcm4*, *mcm6*, *mcm7*, and *mcm10*), related to cell  
303 division cycle (*cdc20*), and cell phase transition (*mos*).

304 *Steroid and hormone receptors.* Compared to Pgr-KO, the expression of *esr2* (estrogen receptor  
305 beta) was lower in WT. Similarly, the expression of *Esr2* was lower in human and mice samples  
306 treated with HCG. On the other hand, the expression of *lhgr* (Luteinizing  
307 hormone/choriogonadotropin receptor) was significantly higher in WT than Pgr-KO fish, with  
308 similar results observed in mice but not in human samples.

## 309 **Discussion**

310 We have performed the first genome-wide differential gene expression analysis that is specifically  
311 designed for the follicular cells of pre-ovulatory oocytes in the zebrafish, and conducted the first

312 comparison of differentially regulated genes in the follicular cells of pre-ovulatory oocytes among  
313 zebrafish, mice, and humans. Our analysis indicates that ovulation is involved in a large network  
314 of approximately 3,000 genes, which is 11.5% of 26,000 available genes in zebrafish, all working  
315 in concert in the follicular cells of pre-ovulatory zebrafish oocytes. The number of ovulation  
316 related genes found in the zebrafish is about three times more than those reported in humans, but  
317 only slightly more than those reported in mice (Table.1). One likely reason is that RNA-Seq is  
318 much more sensitive than microarrays used in previous studies. Or, it is possible that we  
319 overestimate the ovulation-related genes in zebrafish due to differences in gene expression that  
320 may be present before ovulation occurs in Pgr knockout. It is impossible to predict which WT fish  
321 will undergo ovulation unless they have completed final oocyte maturation (see Fig.1 for detail).  
322 Not all fish ovulate daily, so we did not collect follicular cells prior to maturation in current study  
323 due to lacking a reliable marker to identify which fish will ovulate before the completion of oocyte  
324 maturation in vivo. Therefore, it will be necessary to establish an ovulation assay in vitro and to  
325 study gene expression during ovulation. Nevertheless, by comparing our data sets with mammalian  
326 data sets we are able to show many conserved genes are related to ovulation and associated  
327 signaling pathways are very similar whether using the entire set of differentially regulated  
328 zebrafish genes or conserved “ovulatory” genes of fish, mouse, and human. These differentially  
329 expressed genes activate signaling pathways and biological processes that are important for  
330 ovulation to precede while also down regulating signaling pathways involved in growth and  
331 proliferation prior to ovulation. The switch from a period of growth and proliferation to the  
332 ovulation is important for follicular cell rupture and the process to proceed appropriately. These  
333 ovulatory genes and signaling pathways are highly conserved among fish, mice and humans.

334 Therefore, as demonstrated herein and elsewhere, zebrafish offer an alternative model for studying  
335 molecular mechanisms and biological processes that control ovulation.

336 As we noted at beginning, biological processes leading to the ovulation are quite different  
337 between mammalian models and zebrafish model, mainly due to in vivo gestation in mammals in  
338 comparison to external fertilization and development in zebrafish. We were surprised to find so  
339 many conserved “ovulatory” genes as well as a significant number of non-conserved “ovulatory”  
340 genes (Fig.7). A large number of non-conserved “ovulatory” genes is likely due to difference in  
341 experimental treatments, different analytic tools (RNA-seq vs microarray), difference in cell  
342 population, or different molecular mechanisms in control of ovulation in different models. For  
343 accurate comparison, we have to generate transcriptomic data sets using same sensitive sequencing  
344 technique, and same genotype (PGR KO) in different model species. We will focus our discussion  
345 on conserved genes and pathways potentially important for ovulation, since more information is  
346 required for defining different ovulatory mechanisms in different species.

#### 347 *Inflammatory response*

348 Substantial evidence from studies in mammals has shown that biological events occurring in an  
349 ovulating follicle are similar to those in an acute inflammatory response [2, 3, 19]. One major  
350 indicator is the increase of prostaglandins (PGs) resulting from the upregulation of *Ptgs2*, a rate-  
351 limiting step in prostaglandin biosynthesis. It is still unclear whether PGR and PTGS are two  
352 separate downstream pathways of LH signal, as no evidence shows promoter binding sites for PGR  
353 on *Ptgs2*. Some have suggested that several genes including *Pparg* and *Il6* may act as mediators  
354 between PGR and PTGS2, as demonstrated by conditional *Pparg* knockout mice [19]. However,  
355 the transcripts of these mediators were not significantly regulated in the follicular cells of pre-  
356 ovulatory oocytes in zebrafish, implying *Ppar* pathway might not be an important mediator in



357 zebrafish ovulation. Another transcriptional factor, RUNX1 is a candidate mediator since  
358 upregulation of *Ptgs2* by RUNX1 can be inhibited by a PGR antagonist, and direct binding of  
359 RUNX1 to two RUNX-binding motifs in the *Ptgs2* promoter region has been confirmed by CHIP  
360 and EMSA assays [20, 21]. Our finding of significantly upregulated *Runx1* (fold changes>10,  
361  $P<2.40E-20$ ) in the follicular cells of pre-ovulatory oocytes supports that RUNX1 as a mediator  
362 regulating *Ptgs2*. On the other hand, the present study shows one of the PGs receptors, *Ptger4*,  
363 was markedly up-regulated prior to ovulation in both mouse and zebrafish datasets. It has been  
364 shown that *Pgr* directly regulates *ptger4* in the pre-ovulatory follicles of medaka [7, 22]. In  
365 contrast, the role of PTGER4 in ovulation has been overlooked in mammals as studies focused  
366 more on role of PTGER2 in COC expansion and ovulation [23-25]. Our studies provide possible  
367 candidates that involve in PGR signaling pathway and ovulation. Clearly, more studies are needed  
368 to understand the molecular mechanisms that regulate members of PTGS and PTGER and their  
369 functions in ovulation.

### 370 *Vascularization*

371 Vasodilation induced by LH in the pre-ovulatory ovary is required for increased vascular  
372 permeability. This drives leukocytes to migrate from the blood vessels to the interior of the pre-  
373 ovulatory follicles to release multiple cytokines and elicit inflammatory reactions leading to  
374 follicle wall breakdown [19]. The expression of *rgs2*, which shows the greatest increase during  
375 ovulation in our RNA-Seq data (>100 fold), has been suggested to be essential for stabilizing blood  
376 pressure via inhibition of Gq/11-mediated signaling in human cardiovascular system [26, 27].  
377 Evidence also suggests that *Rgs2* expression can be stimulated by LH, but is attenuated by PGR  
378 antagonist or PTGS2 inhibitor in the pre-ovulatory follicles of mice and bovine [28, 29]. It remains

379 to be elucidated whether or not RGS2 can play a similar role in follicle rupture as it does in  
380 cardiovascular system, increasing vascular permeability.

381 NRP1, a well-known membrane bound co-receptor that is involved in VEGF signaling and  
382 vascularization had increased expression in pre-ovulatory follicles of zebrafish, mouse, and  
383 human. NRP1 up-regulates KDR downstream signaling in response to VEGF in angiogenic  
384 modulation [30]. We also found a significant increase of *kdr* expression in the follicular cells of  
385 pre-ovulatory oocytes in zebrafish. To prevent microbleeding during ovulation, multiple  
386 coagulation factors such as *f3*, *f5*, and tissue factor pathway inhibitor 2 (*tfpi2*) are concomitantly  
387 up-regulated in zebrafish, consistent with previous findings in humans [3]. The up-regulation of  
388 *serpine 1* (*pai1*), a blood clotting promoting factor, before ovulation in zebrafish is consistent with  
389 the recent finding in medaka. Serpine1 has been suggested to be a limiting regulator controlling  
390 plasmin hydrolyzing laminin, a major basement membrane component situated between the  
391 granulosa and theca cells of the follicle in medaka [31]. However, since PAI1 deficient mice are  
392 viable, the role of PAI1 in vascularization during ovulation should be further explored [32, 33].

### 393 *Extracellular matrix remodeling and follicle wall breakdown*

394 Proteases are required for extracellular matrix degradation and remodeling, and are essential for  
395 follicular cell rupture and the release of mature oocytes. The involvement of several  
396 metalloproteinases including members of MMP (matrix metalloproteinase), ADAM, and  
397 ADAMTS families have been examined [34-36]. However, evidence of these enzymes being  
398 involved in ovulation is limited, partly due to lack of obvious effects on ovulation or embryonic  
399 lethality in knockouts [37]. Interestingly, expression and knockout studies of *Adamts1* have  
400 suggested the involvement of ADAMTS1 in ovulation and fertility in mammals. *Adamts1* was up-  
401 regulated in the pre-ovulatory follicles of several mammalian species. This up-regulation was

402 partly dependent on the expression of *Pgr* in the granulosa cells. Knockout of *Adamts1* in mice  
403 suggests an important role of this protease as a downstream effector of PGR in ovulation.  
404 Homozygous *Adamts1* knockouts are subfertile, producing litters 4- to 5-fold less than control  
405 littermates, partially due to failed rupture of some large follicles [36]. *Adamts1* knockout mice are  
406 subfertile and have less severe phenotypes than *Pgr* knockout mice, who cannot ovulate and  
407 therefore have no litters. This indicates that ADAMTS1 may not be a key protease, or other PGR  
408 regulated proteases contribute to the ovulatory mechanism. Lacking significant differences in gene  
409 expression, enzyme concentration, or enzymatic activity of ADAMTS1 in infertile women  
410 compared to controls also did not support functional roles of ADAMTS1 in human fertility [38].  
411 ADAMTS1 has been suggested to cleave versican in COC matrix [37, 39], so the functions of this  
412 gene in basal vertebrates may be different since no COC is necessary.

413 Intriguingly, upregulation of *adamts9* in mammals and zebrafish during ovulation suggests  
414 that this enzyme is most likely involved in ovulation, and its function conserved across vertebrate  
415 species. *Adamts9* was found to be upregulated in pre-ovulatory follicles or GCs following HCG  
416 treatment in macaque and human [2, 3, 40]. GON-1, an ortholog of ADAMTS9, is involved in the  
417 degradation of extracellular matrix (ECM) and is essential for gonadal morphogenesis in *C.*  
418 *elegans*. GON-1 helps migration of distal tip cells by degrading extracellular matrix components.  
419 In GON-1 mutants, the adult gonad is severely disorganized with no arm extension and no  
420 recognizable somatic structure. The developmental defects in *gon-1* mutants are limited to the  
421 gonad; other cells, tissues, and organs develop normally in *C. elegans*. However, functions of  
422 ADAMTS9 in vertebrates have not been established, partly due to *Adamts9* knockout mice dying  
423 before gastrulation [41]. Thus, using alternative models or establishing conditional knockouts are  
424 required for examining the function of ADAMTS9 in vertebrates.

425 *Missing information was compensated by our fish data*

426 Some important ovulatory genes and signaling pathways such as ERBB, PI3K, and WNT signaling  
427 are unexpectedly missing in the shared gene lists and conserved enrichment maps, but significantly  
428 enriched in zebrafish data set (Table 3; Fig.6). ERBB signaling (epidermal growth factor receptor  
429 signaling) is induced by the LH surge through the activation of EGF-like factors [42]. The  
430 increased expressions of *lhcgr*, *egfr*, and *mapk1* along with downstream genes (e.g. *ptgs2*, *tnfaip6*)  
431 in the follicular cells of WT pre-ovulatory zebrafish oocytes suggest that ERBB signaling is  
432 conserved and involved in the ovulation of vertebrates. Knockouts of PTEN inhibited PI3K  
433 signaling, increased susceptibility to apoptosis and enhanced ovulation in mice [43]. We also found  
434 that *pten* (a tumor suppressor) was highly expressed in the follicular cells of WT, and PI3K/Akt  
435 signaling was enriched in up-regulated genes (Fig.6). Similarly, tumor suppressor genes *dab2ip*  
436 and *foxo3* were expressed much higher in WT, which correlated to WNT signaling being enriched  
437 in zebrafish. FOXO3 has been shown to inhibit WNT signaling and cancer development [44, 45].  
438 Notably, we found at least 232 human tumor suppressor [46] homolog genes that were  
439 differentially expressed in the follicular cells of zebrafish pre-ovulatory oocytes. Molecular  
440 mechanisms and functions of these tumor related genes during vertebrate ovulation is still unclear.

441 Hypoxia typically occurs at the time of ovulation [47]. This is supported by high expression  
442 levels of *hif1a* (hypoxia-inducible factor 1, alpha subunit like) in the follicular cells of WT pre-  
443 ovulatory oocytes. Hypoxia response also activates angiogenesis, consistent with the high  
444 expression of vascular endothelial growth factor receptors *flt1* and *kdr* in WT fish. Activation of  
445 NF- $\kappa$ B (nuclear factor kappaB) is a critical part of transcriptional response to hypoxia and the local  
446 inflammatory response [48, 49]. High expression of *rela/p65*, a component of NF- $\kappa$ B, increased  
447 expression of *nfkbia* (NF-KappaB inhibitor, alpha) encoding the cognate binding inhibitor of Rela,

448 and several ubiquitin related genes (*ubb*, *ubc*, *uba52*, *ube2a*, Table 3). This suggests possible  
449 activation of NF- $\kappa$ B signaling in pre-ovulatory follicular cells in response to hypoxia-like  
450 conditions of ovulation [50]. The high expression of *tnfrsf21* (tumor necrosis factor receptor  
451 superfamily, member 21/death receptor 6), during ovulation suggests that activation of NF- $\kappa$ B  
452 signaling is also involved in local inflammation [51]. Intriguingly, *il1b* showed low expression in  
453 WT fish, although IL1B could induce direct binding of NF- $\kappa$ B to the promoter sequence of  
454 ADAMTS9 in human chondrocytes [52]. More studies are required to understand the activation  
455 and involvement of NF- $\kappa$ B in response to hypoxia, and its regulation of inflammation and  
456 ADAMTS9 during ovulation.

457 In summary, for the first time we successfully identified genes and signaling pathways that  
458 are potentially important for ovulation in zebrafish, a non-mammalian vertebrate model, using  
459 high-throughput sequencing and Pgr-KO. The comparison of differentially regulated genes among  
460 human, mouse, and zebrafish datasets further confirm that genes and signaling pathways important  
461 for ovulation are conserved among vertebrates. Zebrafish should serve as an excellent model for  
462 studying the function of genes and signaling pathways that are important for ovulation.

463

## 464 Reference

- 465 1. Hernandez-Gonzalez I, Gonzalez-Robayna I, Shimada M, Wayne CM, Ochsner SA, White L,  
466 Richards JS. Gene Expression Profiles of Cumulus Cell Oocyte Complexes during Ovulation Reveal  
467 Cumulus Cells Express Neuronal and Immune-Related Genes: Does this Expand Their Role in the  
468 Ovulation Process? *Mol Endocrinol* 2006; 20:1300-1321.
- 469 2. Xu F, Stouffer RL, Muller J, Hennebold JD, Wright JW, Bahar A, Leder G, Peters M, Thorne M, Sims  
470 M, Wintermantel T, Lindenthal B. Dynamics of the transcriptome in the primate ovulatory follicle.  
471 *Mol Hum Reprod* 2011; 17:152-165.
- 472 3. Wissing ML, Kristensen SG, Andersen CY, Mikkelsen AL, Host T, Borup R, Grondahl ML.  
473 Identification of new ovulation-related genes in humans by comparing the transcriptome of  
474 granulosa cells before and after ovulation triggering in the same controlled ovarian stimulation  
475 cycle. *Hum Reprod* 2014; 29:997-1010.

- 476 4. Gohin M, Bobe J, Chesnel F. Comparative transcriptomic analysis of follicle-enclosed oocyte  
477 maturational and developmental competence acquisition in two non-mammalian vertebrates.  
478 BMC Genomics 2010; 11:18.
- 479 5. Chapman RW, Reading BJ, Sullivan CV. Ovary transcriptome profiling via artificial intelligence  
480 reveals a transcriptomic fingerprint predicting egg quality in striped bass, *Morone saxatilis*. PLoS  
481 One 2014; 9:e96818.
- 482 6. Reading BJ, Chapman RW, Schaff JE, Scholl EH, Opperman CH, Sullivan CV. An ovary transcriptome  
483 for all maturational stages of the striped bass (*Morone saxatilis*), a highly advanced perciform fish.  
484 BMC Res Notes 2012; 5:111.
- 485 7. Hagiwara A, Ogiwara K, Katsu Y, Takahashi T. Luteinizing Hormone-Induced Expression of *Ptger4b*,  
486 a Prostaglandin E2 Receptor Indispensable for Ovulation of the Medaka *Oryzias latipes*, Is  
487 Regulated by a Genomic Mechanism Involving Nuclear Progesterone Receptor. Biol Reprod 2014;  
488 90:126, 121-114.
- 489 8. Hanna RN, Zhu Y. Controls of meiotic signaling by membrane or nuclear progesterone receptor in  
490 zebrafish follicle-enclosed oocytes. Mol Cell Endocrinol 2011; 337:80-88.
- 491 9. Zhu Y, Liu D, Shaner ZC, Chen S, Hong W, Stellwag EJ. Nuclear progesterone receptor (*pgr*) knockouts  
492 in zebrafish demonstrate role for *pgr* in ovulation but not in rapid non-genomic steroid mediated  
493 meiosis resumption. Front Endocrinol (Lausanne) 2015; 6:37.
- 494 10. Lydon JP, DeMayo FJ, Funk CR, Mani SK, Hughes AR, Montgomery CA, Jr., Shyamala G, Conneely  
495 OM, O'Malley BW. Mice lacking progesterone receptor exhibit pleiotropic reproductive  
496 abnormalities. Genes Dev 1995; 9:2266-2278.
- 497 11. Dobin A, Davis CA, Schlesinger F, Drenkow J, Zaleski C, Jha S, Batut P, Chaisson M, Gingeras TR.  
498 STAR: ultrafast universal RNA-seq aligner. Bioinformatics 2013; 29:15-21.
- 499 12. Anders S, Pyl PT, Huber W. HTSeq—a Python framework to work with high-throughput sequencing  
500 data. Bioinformatics 2014; 31:166-169.
- 501 13. Anders S, Huber W. Differential expression analysis for sequence count data. Genome Biol 2010;  
502 11:1-12.
- 503 14. Gautier L, Cope L, Bolstad BM, Irizarry RA. *affy*—analysis of Affymetrix GeneChip data at the probe  
504 level. Bioinformatics 2004; 20:307-315.
- 505 15. Ritchie ME, Phipson B, Wu D, Hu Y, Law CW, Shi W, Smyth GK. *limma* powers differential  
506 expression analyses for RNA-sequencing and microarray studies. Nucleic Acids Res 2015; 43:e47.
- 507 16. Merico D, Isserlin R, Stueker O, Emili A, Bader GD. Enrichment map: a network-based method for  
508 gene-set enrichment visualization and interpretation. PLoS One 2010; 5:e13984.
- 509 17. Nallasamy S, Kim J, Sitruk-Ware R, Bagchi M, Bagchi I. Ulipristal blocks ovulation by inhibiting  
510 progesterone receptor-dependent pathways intrinsic to the ovary. Reprod Sci 2013; 20:371-381.
- 511 18. Richards JS, Hernandez-Gonzalez I, Gonzalez-Robayna I, Teuling E, Lo Y, Boerboom D, Falender AE,  
512 Doyle KH, LeBaron RG, Thompson V, Sandy JD. Regulated expression of ADAMTS family members  
513 in follicles and cumulus oocyte complexes: evidence for specific and redundant patterns during  
514 ovulation. Biol Reprod 2005; 72:1241-1255.
- 515 19. Kim J, Bagchi IC, Bagchi MK. Control of ovulation in mice by progesterone receptor-regulated gene  
516 networks. Mol Hum Reprod 2009; 15:821-828.
- 517 20. Jo M, Curry TE. Luteinizing Hormone-Induced *RUNX1* Regulates the Expression of Genes in  
518 Granulosa Cells of Rat Periovarian Follicles. Mol Endocrinol 2006; 20:2156-2172.
- 519 21. Liu J, Park E-S, Jo M. Runt-Related Transcription Factor 1 Regulates Luteinized Hormone-Induced  
520 Prostaglandin-Endoperoxide Synthase 2 Expression in Rat Periovarian Granulosa Cells.  
521 Endocrinology 2009; 150:3291-3300.

- 522 22. Fujimori C, Ogiwara K, Hagiwara A, Takahashi T. New evidence for the involvement of  
523 prostaglandin receptor EP4b in ovulation of the medaka, *Oryzias latipes*. *Mol Cell Endocrinol* 2012;  
524 362:76-84.
- 525 23. Harris SM, Aschenbach LC, Skinner SM, Dozier BL, Duffy DM. Prostaglandin E2 Receptors Are  
526 Differentially Expressed in Subpopulations of Granulosa Cells from Primate Periovarian Follicles.  
527 *Biol Reprod* 2011; 85:916-923.
- 528 24. Kim SO, Harris SM, Duffy DM. Prostaglandin E2 (EP) Receptors Mediate PGE2-Specific Events in  
529 Ovulation and Luteinization Within Primate Ovarian Follicles. *Endocrinology* 2014; 155:1466-1475.
- 530 25. Trau HA, Brannstrom M, Curry TE, Jr., Duffy DM. Prostaglandin E2 and vascular endothelial growth  
531 factor A mediate angiogenesis of human ovarian follicular endothelial cells. *Hum Reprod* 2016;  
532 31:436-444.
- 533 26. Doggrell SA. Is RGS-2 a new drug development target in cardiovascular disease? *Expert Opin Ther*  
534 *Targets* 2004; 8:355-358.
- 535 27. Zhang P, Mende U. Functional role, mechanisms of regulation, and therapeutic potential of  
536 regulator of G protein signaling 2 in the heart. *Trends Cardiovasc Med* 2014; 24:85-93.
- 537 28. Ujioka T, Russell DL, Okamura H, Richards JS, Espey LL. Expression of regulator of G-protein  
538 signaling protein-2 gene in the rat ovary at the time of ovulation. *Biol Reprod* 2000; 63:1513-1517.
- 539 29. Sayasith K, Sirois J, Lussier JG. Expression and regulation of regulator of G-protein signaling  
540 protein-2 (RGS2) in equine and bovine follicles prior to ovulation: molecular characterization of  
541 RGS2 transactivation in bovine granulosa cells. *Biol Reprod* 2014; 91:1-12.
- 542 30. Kofler NM, Simons M. Angiogenesis versus arteriogenesis: neuropilin 1 modulation of VEGF  
543 signaling. *F1000Prime Rep* 2015; 7:26.
- 544 31. Ogiwara K, Hagiwara A, Rajapakse S, Takahashi T. The role of urokinase plasminogen activator and  
545 plasminogen activator inhibitor-1 in follicle rupture during ovulation in the teleost medaka. *Biol*  
546 *Reprod* 2015; 92:10.
- 547 32. Carmeliet P, Kieckens L, Schoonjans L, Ream B, van Nuffelen A, Prendergast G, Cole M, Bronson R,  
548 Collen D, Mulligan RC. Plasminogen activator inhibitor-1 gene-deficient mice. I. Generation by  
549 homologous recombination and characterization. *J Clin Invest* 1993; 92:2746-2755.
- 550 33. Binder BR, Christ G, Gruber F, Grubic N, Hufnagl P, Krebs M, Mihaly J, Prager GW. Plasminogen  
551 Activator Inhibitor 1: Physiological and Pathophysiological Roles. *Physiology* 2002; 17:56-61.
- 552 34. Sriraman V, Eichenlaub-Ritter U, Bartsch JW, Rittger A, Mulders SM, Richards JS. Regulated  
553 expression of ADAM8 (a disintegrin and metalloprotease domain 8) in the mouse ovary: evidence  
554 for a regulatory role of luteinizing hormone, progesterone receptor, and epidermal growth factor-  
555 like growth factors. *Biol Reprod* 2008; 78:1038-1048.
- 556 35. Brown HM, Dunning KR, Robker RL, Boerboom D, Pritchard M, Lane M, Russell DL. ADAMTS1  
557 cleavage of versican mediates essential structural remodeling of the ovarian follicle and cumulus-  
558 oocyte matrix during ovulation in mice. *Biol Reprod* 2010; 83:549-557.
- 559 36. Robker RL, Russell DL, Espey LL, Lydon JP, O'Malley BW, Richards JS. Progesterone-regulated genes  
560 in the ovulation process: ADAMTS-1 and cathepsin L proteases. *Proc Natl Acad Sci U S A* 2000;  
561 97:4689-4694.
- 562 37. Brunet FG, Fraser FW, Binder MJ, Smith AD, Kintakas C, Dancevic CM, Ward AC, McCulloch DR.  
563 The evolutionary conservation of the A Disintegrin-like and Metalloproteinase domain with  
564 Thrombospondin-1 motif metzincins across vertebrate species and their expression in teleost  
565 zebrafish. *BMC Evol Biol* 2015; 15:1-15.
- 566 38. Cookingham LM, Van Voorhis BJ, Ascoli M. Do alterations in follicular fluid proteases contribute  
567 to human infertility? *J Assist Reprod Genet* 2015; 32:737-745.



- 568 39. Russell DL, Doyle KM, Ochsner SA, Sandy JD, Richards JS. Processing and localization of ADAMTS-  
569 1 and proteolytic cleavage of versican during cumulus matrix expansion and ovulation. *J Biol Chem*  
570 2003; 278:42330-42339.
- 571 40. Peluffo MC, Murphy MJ, Baughman ST, Stouffer RL, Hennebold JD. Systematic analysis of protease  
572 gene expression in the rhesus macaque ovulatory follicle: metalloproteinase involvement in  
573 follicle rupture. *Endocrinology* 2011; 152:3963-3974.
- 574 41. Enomoto H, Nelson CM, Somerville RP, Mielke K, Dixon LJ, Powell K, Apte SS. Cooperation of two  
575 ADAMTS metalloproteases in closure of the mouse palate identifies a requirement for versican  
576 proteolysis in regulating palatal mesenchyme proliferation. *Development* 2010; 137:4029-4038.
- 577 42. Hsieh M, Lee D, Panigone S, Horner K, Chen R, Theologis A, Lee DC, Threadgill DW, Conti M.  
578 Luteinizing hormone-dependent activation of the epidermal growth factor network is essential  
579 for ovulation. *Mol cell biol* 2007; 27:1914-1924.
- 580 43. Fan H-Y, Liu Z, Cahill N, Richards JS. Targeted Disruption of Pten in Ovarian Granulosa Cells  
581 Enhances Ovulation and Extends the Life Span of Luteal Cells. *Mol Endocrinol* 2008; 22:2128-2140.
- 582 44. Dehner M, Hadjihannas M, Weiske J, Huber O, Behrens J. Wnt signaling inhibits Forkhead box  
583 O3a-induced transcription and apoptosis through up-regulation of serum- and glucocorticoid-  
584 inducible kinase 1. *J Biol Chem* 2008; 283:19201-19210.
- 585 45. Liu H, Yin J, Wang H, Jiang G, Deng M, Zhang G, Bu X, Cai S, Du J, He Z. FOXO3a modulates  
586 WNT/beta-catenin signaling and suppresses epithelial-to-mesenchymal transition in prostate  
587 cancer cells. *Cell Signal* 2015; 27:510-518.
- 588 46. Zhao M, Kim P, Mitra R, Zhao J, Zhao Z. TSGene 2.0: an updated literature-based knowledgebase  
589 for tumor suppressor genes. *Nucleic Acids Res* 2016; 44:D1023-1031.
- 590 47. Kim J, Bagchi IC, Bagchi MK. Signaling by Hypoxia-Inducible Factors Is Critical for Ovulation In Mice.  
591 *Endocrinology* 2009; 150:3392-3400.
- 592 48. Culver C, Sundqvist A, Mudie S, Melvin A, Xirodimas D, Rocha S. Mechanism of Hypoxia-Induced  
593 NF- $\kappa$ B. *Mol Cell Biol* 2010; 30:4901-4921.
- 594 49. Pahl HL. Activators and target genes of Rel/NF-kappaB transcription factors. *Oncogene* 1999;  
595 18:6853-6866.
- 596 50. Verma IM, Stevenson JK, Schwarz EM, Van Antwerp D, Miyamoto S. Rel/NF-kappa B/I kappa B  
597 family: intimate tales of association and dissociation. *Genes Dev* 1995; 9:2723-2735.
- 598 51. Pan G, Bauer JH, Haridas V, Wang S, Liu D, Yu G, Vincenz C, Aggarwal BB, Ni J, Dixit VM.  
599 Identification and functional characterization of DR6, a novel death domain-containing TNF  
600 receptor. *FEBS Lett* 1998; 431:351-356.
- 601 52. Altuntas A, Halacli SO, Cakmak O, Erden G, Akyol S, Ugurcu V, Hirohata S, Demircan K. Interleukin-  
602 1beta induced nuclear factor-kappaB binds to a disintegrin-like and metalloproteinase with  
603 thrombospondin type 1 motif 9 promoter in human chondrosarcoma cells. *Mol Med Rep* 2015;  
604 12:595-600.

605

## 606 **Figures Legends**

607 **Figure 1.** Final oocyte maturation (FOM) and ovulation are easily observable and  
608 distinguishable with naked eyes in zebrafish. Representative maturing oocytes are on the left (A1-  
609 A4), and representative changes in ovaries are on the right (B1-B3). FOM (resumption of meiosis)



610 occurs prior to ovulation. The maturation process includes germinal vesicle break down (GVBD),  
611 chromosome condensation, assembly of meiotic spindle, and formation of the first polar body.  
612 Change in cytoplasm appearance of stage IV oocytes from opaque (in yellow) to transparent (in  
613 light gray) is the most reliable indication that oocyte maturation is complete (from A1 to A2, or  
614 B1 or B2) in zebrafish. Once ovulation is complete, these mature and transparent oocytes migrate  
615 to the posterior of animal body (A2 to A3, and A4; or B2 to B3), ready to be released and fertilized  
616 outside. These recurring tissue remodeling processes, including maturation and ovulation, happen  
617 daily in wildtype (WT) zebrafish. In contrast, oocyte growth and maturation occur normally but  
618 ovulation was completely blocked in Pgr knockout (Pgr-KO). Matured oocytes were absorbed  
619 before next wave of oocytes going through GVBD and FOM in Pgr-KO females. Follicular cells  
620 used in this study were all collected from same stage of oocytes, i.e. after maturation but prior to  
621 the ovulation (panels A2 & B2) from WT or Pgr-KO fish.

622

623 **Figure 2. Principal component analysis (PCA) of transcriptomic data from pre-ovulatory**  
624 **follicular cells of Pgr-KO and wildtype (WT) zebrafish.** The blue circles represent  
625 transcriptomic data from three pre-ovulatory follicular samples collected from three Pgr-KO fish,  
626 and the green circles represent the data from three samples of three WT fish.

627

628 **Figure 3. Heat map of top 2000 differentially expressed genes ranked by FDR-corrected p-**  
629 **value between WT and Pgr-KO.** Each column represents an independent sample collected from  
630 follicular cells of stage IV oocytes that have completed final oocyte maturation, but prior to  
631 ovulation.

632

633 **Figure 4. Distribution of up- or down-regulated genes in wildtype (WT) compared to Pgr**  
634 **knockout (Pgr-KO).** Majority of top 500 genes are up-regulated in WT indicate increase of gene  
635 expression is important for ovulation.

636

637 **Figure 5. Validation of RNA-Seq results using real-time quantitative PCR (qPCR) based**  
638 **on relative fold changes of 23 selected genes in WT compared to Pgr-KO.** Relative fold  
639 changes were expressed as log 2 of normalized average count (RNA-seq), or mean copy number  
640 (qPCR) of each gene in three WT samples (n=3) divided by those respective numbers in three  
641 Pgr-KO (n=3). The expression of *adamts1* was undetectable in the follicular cells by RNA-Seq  
642 and qPCR, and therefore was not included. Correlation coefficients ( $R^2$ ) between qRT-PCR and  
643 RNA-Seq based expression profiles is 0.963.

644

645 **Figure 6. Enrichment map analysis showed two groups of biological processes and**  
646 **pathways, which were significantly enhanced or suppressed in wildtype (WT) compared to**  
647 **Pgr-KO (p=0.0005).** Nodes represent enriched gene sets, clustered automatically by the  
648 Enrichment Map plugin for Cytoscape program [16] according to the number of genes shared  
649 within sets. Node size is proportional to the total number of genes within each gene set. Proportion  
650 of shared genes between gene sets are represented by the thickness of the line between nodes.  
651 Functionally related gene sets were manually grouped, encircled by a dashed black line, and  
652 labeled. **A.** Enrichment map for 1230 up-regulated genes in WT compared to Pgr-KO. **B.**  
653 Enrichment map for 1658 down-regulated genes in WT compared to those in Pgr-KO.

654

655 **Figure 7. Comparison of significantly regulated genes in the follicular cells of zebrafish,**  
656 **human, and mouse during ovulation.** Ensembl numbers of genes in each group that were derived  
657 from differentially regulated genes in human or zebrafish were converted to their respective mouse  
658 homologs. **A.** Up-regulated genes in WT zebrafish that underwent natural spawning cycle likely  
659 exposed to LH in vivo, in human or mouse follicular cells treated with HCG. A total of 283 genes  
660 (73 + 56 + 154) were up-regulated in WT fish during ovulation, as well as in humans and/or mice.  
661 **B.** A total of 378 genes (140 + 81 + 157) were down-regulated in WT zebrafish, humans or mice  
662 during ovulation.

663

664 **Figure 8. Enrichment map analysis using conserved 283 up-regulated and 378 down-**  
665 **regulated genes shared between fish and mammals (human and/or mice) during ovulation**  
666 **(p=0.0005).** **A.** Up-regulated biological processes during ovulation which include: transmembrane  
667 transportation, protein kinases, MAPK/JNK cascades, angiogenesis, the inflammatory response,  
668 cytokine production, cell migration, chemotaxis, extracellular matrix organization, cell growth,  
669 and cytoskeleton reorganization. **B.** Down-regulated biological processes during ovulation  
670 include: Pyrimidine metabolism, DNA repair, DNA methylation, DNA binding, DNA replication,  
671 cell cycle checkpoints, oocyte meiosis, chromatin modification, and cell phase transition.

Table 1. Comparison of three transcriptomic experiments for analyzing differentially regulated genes during ovulation in the follicular cells of zebrafish, human and mouse.

| Species               | <i>Human</i>                                           | <i>Mouse</i>                              | <i>Zebrafish</i>                          |
|-----------------------|--------------------------------------------------------|-------------------------------------------|-------------------------------------------|
| GEO or EMBL accession | E-MTAB-2203                                            | GSE4260                                   | current study                             |
| Platform              | Microarray                                             | Microarray                                | NGS                                       |
| Genotype              | WT                                                     | WT                                        | Pgr-KO & WT                               |
| Treatment             | HCG 36h                                                | HCG 8h                                    | no                                        |
| Biological replicates | 9 paired                                               | 2 repeats                                 | 3 Pgr-KO or 3 WT                          |
| Cutoff                | $ \text{lfc}  > 1$ ; $\text{padj} < 0.05$ <sup>a</sup> | $ \text{lfc}  > 1$ ; $\text{padj} < 0.05$ | $ \text{lfc}  > 1$ ; $\text{padj} < 0.05$ |
| Comparison            | 36h vs 0h                                              | 8h vs 0h                                  | WT vs KO                                  |
| Up-regulated          | 852                                                    | 1356                                      | 1544                                      |
| Down-regulated        | 884                                                    | 1553                                      | 2025                                      |

a. Lfc, log<sub>2</sub> fold change. padj, FDR-corrected p-value.

Table 2. Representative differentially regulated genes in zebrafish during ovulation that are conserved between zebrafish, human and mouse.

| gene symbol (mouse)                                             | gene title                                                          | gene symbol (zebrafish) | shared type <sup>a</sup> | log2 Fold Change <sup>b</sup> | FDR p-value |
|-----------------------------------------------------------------|---------------------------------------------------------------------|-------------------------|--------------------------|-------------------------------|-------------|
| <i>Inflammatory response and apoptosis</i>                      |                                                                     |                         |                          |                               |             |
| <i>Maf</i>                                                      | Avian musculoaponeurotic fibrosarcoma (v-maf) AS42 oncogene homolog | <i>MAF (2 OF 2)</i>     | T1                       | 3.65                          | 1.52E-14    |
| <i>Pla2g4a</i>                                                  | Phospholipase A2, group IVA                                         | <i>cpla2</i>            | T1                       | 3.46                          | 2.43E-17    |
| <i>Azin1</i>                                                    | Antizyme inhibitor 1                                                | <i>azin1a</i>           | T1                       | 3.38                          | 2.77E-14    |
| <i>Runx1</i>                                                    | Runt related transcription factor 1                                 | <i>runx1</i>            | T1                       | 3.27                          | 2.39E-20    |
| <i>Ptgs2</i>                                                    | Prostaglandin endoperoxide synthase 2                               | <i>ptgs2a</i>           | T1                       | 3.25                          | 4.30E-08    |
| <i>Zbtb16</i>                                                   | Zinc finger and BTB domain containing 16                            | <i>zbtb16a</i>          | T1                       | 3.11                          | 9.48E-18    |
| <i>Tnfrsf21</i>                                                 | Tumor necrosis factor receptor superfamily, member 21               | <i>tnfrsf21</i>         | T1                       | 2.66                          | 1.47E-08    |
| <i>Gadd45a</i>                                                  | Growth arrest and DNA-damage-inducible 45 alpha                     | <i>gadd45ab</i>         | T1                       | 2.45                          | 7.78E-11    |
| <i>Mcl1</i>                                                     | myeloid cell leukemia sequence 1                                    | <i>bcl2l10</i>          | T1                       | 2.32                          | 2.35E-08    |
| <i>Litaf</i>                                                    | LPS-induced TN factor                                               | <i>litaf</i>            | T1                       | 1.63                          | 3.44E-05    |
| <i>Slco2a1</i>                                                  | Solute carrier organic anion transporter family, member 2a1         | <i>slco2a1</i>          | T1                       | 1.62                          | 7.43E-04    |
| <i>Hipk2</i>                                                    | Homeodomain interacting protein kinase 2                            | <i>hipk2</i>            | T1                       | 1.28                          | 4.11E-03    |
| <i>Nr1d2</i>                                                    | Nuclear receptor subfamily 1, group D, member 2                     | <i>nr1d2a</i>           | T2                       | 4.11                          | 9.24E-26    |
| <i>Snai2</i>                                                    | Snail family zinc finger 2                                          | <i>snai2</i>            | T2                       | 3.43                          | 8.90E-19    |
| <i>Clu</i>                                                      | Clusterin                                                           | <i>clu</i>              | T2                       | 2.90                          | 9.23E-08    |
| <i>Socs3</i>                                                    | Suppressor of cytokine signaling 3                                  | <i>socs3a</i>           | T2                       | 1.42                          | 1.96E-04    |
| <i>Adam8</i>                                                    | A disintegrin and metallopeptidase domain 8                         | <i>adam8b</i>           | T3                       | 3.55                          | 7.95E-25    |
| <i>Ptger4</i>                                                   | Prostaglandin E receptor 4                                          | <i>ptger4b</i>          | T3                       | 3.13                          | 5.77E-11    |
| <i>Csf1r</i>                                                    | Colony stimulating factor 1 receptor                                | <i>csf1ra</i>           | T3                       | 2.92                          | 4.13E-08    |
| <i>Nt5e</i>                                                     | ecto-5'-nucleotidase                                                | <i>nt5e</i>             | T3                       | 2.37                          | 1.89E-05    |
| <i>Furin</i>                                                    | Furin                                                               | <i>furina</i>           | T3                       | 1.84                          | 1.32E-04    |
| <i>Vascularization</i>                                          |                                                                     |                         |                          |                               |             |
| <i>Rgs2</i>                                                     | Regulator of G-protein signaling 2                                  | <i>rgs2</i>             | T1                       | 7.21                          | 4.08E-86    |
| <i>F3</i>                                                       | Coagulation factor III                                              | <i>f3a</i>              | T1                       | 4.86                          | 7.20E-30    |
| <i>Zfand5</i>                                                   | Zinc finger, AN1-type domain 5                                      | <i>zfand5a</i>          | T1                       | 3.12                          | 3.93E-16    |
| <i>Nrp1</i>                                                     | Neuropilin 1                                                        | <i>nrp1a</i>            | T1                       | 1.98                          | 9.89E-05    |
| <i>Tfpi2</i>                                                    | Tissue factor pathway inhibitor 2                                   | <i>tfpi2</i>            | T1                       | 1.71                          | 8.49E-04    |
| <i>Sema3a</i>                                                   | Semaphorin 3A                                                       | <i>sema3ab</i>          | T1                       | 1.15                          | 7.00E-03    |
| <i>F5</i>                                                       | Coagulation factor V                                                | <i>f5</i>               | T2                       | 6.56                          | 4.92E-54    |
| <i>Serpine1</i>                                                 | Serine (or cysteine) peptidase inhibitor, clade E, member 1         | <i>serpine1</i>         | T2                       | 1.84                          | 1.87E-05    |
| <i>ApoE</i>                                                     | Apolipoprotein E                                                    | <i>apoea</i>            | T2                       | 1.67                          | 9.51E-05    |
| <i>Ppap2b</i>                                                   | Phosphatidic acid phosphatase type 2B                               | <i>ppap2b</i>           | T3                       | 3.24                          | 2.22E-15    |
| <i>Adipor2</i>                                                  | Adiponectin receptor 2                                              | <i>adipor2</i>          | T3                       | 2.07                          | 1.37E-06    |
| <i>Cell-matrix adhesion and extracellular matrix remodeling</i> |                                                                     |                         |                          |                               |             |
| <i>Tnfaip6</i>                                                  | Tumor necrosis factor alpha induced protein 6                       | <i>tnfaip6</i>          | T1                       | 2.25                          | 1.26E-07    |

Table 2. Continued

| gene symbol (mouse)     | gene title                                                                   | gene symbol (zebrafish) | shared type | log2 Fold Change | FDR p-value |
|-------------------------|------------------------------------------------------------------------------|-------------------------|-------------|------------------|-------------|
| <i>Adamts9</i>          | A disintegrin-like and metalloproteinase with thrombospondin type 1 motif, 9 | <i>adamts9</i>          | T1          | 5.91             | 8.44E-41    |
| <i>Ptx3</i>             | Pentraxin 3                                                                  | <i>ptx3b</i>            | T1          | 4.68             | 3.45E-15    |
| <i>Timp2</i>            | Tissue inhibitor of metalloproteinase 2                                      | <i>timp2a</i>           | T1          | 3.43             | 2.34E-21    |
| <i>Rnd3</i>             | Rho family GTPase 3                                                          | <i>rnd3b</i>            | T1          | 2.33             | 1.68E-07    |
| <i>Ezr</i>              | Ezrin                                                                        | <i>ezra</i>             | T1          | 1.84             | 1.91E-04    |
| <i>Cd151</i>            | CD151 antigen                                                                | <i>cd151</i>            | T1          | 1.76             | 5.99E-05    |
| <i>Mkln1</i>            | Muskelin 1                                                                   | <i>mkln1</i>            | T2          | 3.51             | 7.11E-18    |
| <i>Cldn11</i>           | Claudin 11                                                                   | <i>cldn11a</i>          | T2          | 2.19             | 4.65E-08    |
| <i>Palld</i>            | Palladin                                                                     | <i>palld</i>            | T2          | 2.19             | 9.19E-07    |
| <i>Thbs4</i>            | Thrombospondin 4                                                             | <i>thbs4a</i>           | T2          | 2.05             | 3.09E-04    |
| <i>Ctnnd1</i>           | Catenin delta 1                                                              | <i>ctnnd1</i>           | T3          | 4.20             | 2.41E-12    |
| <i>Net1</i>             | Neuroepithelial cell transforming gene 1                                     | <i>net1</i>             | T3          | 2.79             | 2.84E-12    |
| <i>Dapk3</i>            | Death-associated protein kinase 3                                            | <i>dapk3</i>            | T3          | 2.09             | 1.49E-09    |
| <i>Lox</i>              | Lysyl oxidase                                                                | <i>lox</i>              | T3          | 1.92             | 1.83E-04    |
| <i>Cell cycle</i>       |                                                                              |                         |             |                  |             |
| <i>Rgcc</i>             | Regulator of cell cycle                                                      | <i>rgcc</i>             | T1          | 1.44             | 1.21E-03    |
| <i>Ccnb2</i>            | Cyclin B2                                                                    | <i>ccnb2</i>            | T1          | -2.89            | 4.82E-08    |
| <i>Ccna2</i>            | Cyclin A2                                                                    | <i>ccna2</i>            | T1          | -2.70            | 1.00E-07    |
| <i>Mki67</i>            | antigen identified by monoclonal antibody Ki 67                              | <i>mki67</i>            | T1          | -2.68            | 9.26E-13    |
| <i>Mcm3</i>             | Minichromosome maintenance deficient 3                                       | <i>mcm3l</i>            | T1          | -2.16            | 1.45E-05    |
| <i>Cdc6</i>             | Cell division cycle 6                                                        | <i>cdc6</i>             | T1          | -1.86            | 1.06E-05    |
| <i>Mcm10</i>            | Minichromosome maintenance deficient 10                                      | <i>mcm10</i>            | T1          | -1.77            | 5.31E-06    |
| <i>Chek1</i>            | Checkpoint kinase 1                                                          | <i>chk1</i>             | T1          | -1.70            | 2.67E-04    |
| <i>Cdc20</i>            | Cell division cycle 20                                                       | <i>cdc20</i>            | T2          | -2.88            | 2.49E-10    |
| <i>Ccnb1</i>            | Cyclin B1                                                                    | <i>ccnb1</i>            | T2          | -2.72            | 5.35E-06    |
| <i>Chek2</i>            | Checkpoint kinase 2                                                          | <i>chk2</i>             | T2          | -2.31            | 2.65E-08    |
| <i>Cdk1</i>             | Cyclin-dependent kinase 1                                                    | <i>cdk1</i>             | T2          | -2.29            | 4.47E-07    |
| <i>Pcna</i>             | Proliferating cell nuclear antigen                                           | <i>pcna</i>             | T2          | -2.12            | 2.32E-05    |
| <i>Cdk2</i>             | Cyclin-dependent kinase 2                                                    | <i>cdk2</i>             | T2          | -1.33            | 3.34E-03    |
| <i>Mos</i>              | Moloney sarcoma oncogene                                                     | <i>mos</i>              | T3          | -2.67            | 2.48E-08    |
| <i>Hormone receptor</i> |                                                                              |                         |             |                  |             |
| <i>Lhcgr</i>            | Luteinizing hormone/choriogonadotropin receptor                              | <i>lhcgrr</i>           | T3          | 1.74             | 1.19E-04    |
| <i>Esr2</i>             | Estrogen receptor beta                                                       | <i>esr2b</i>            | T1          | -1.39            | 1.29E-03    |

- T1, genes that were regulated similarly among all three species; T2, genes that were regulated similarly only between human and zebrafish; T3, genes that were regulated similarly only between mice and zebrafish.
- Changes in gene expression were based on log2 fold of the expression in wildtype relative to those in Pgr-KO. Genes were listed by fold change within each shared type in each category.

Table 3. Representative genes and signaling pathways that are important for ovulation in zebrafish.

| gene symbol (mouse)               | gene title                                                       | gene symbol (zebrafish) | log2 Fold Change <sup>b</sup> | FDR p-value |
|-----------------------------------|------------------------------------------------------------------|-------------------------|-------------------------------|-------------|
| <i>ErbB signaling</i>             |                                                                  |                         |                               |             |
| <i>Mapk1</i>                      | Mitogen-activated protein kinase 1                               | <i>mapk1</i>            | 4.62                          | 4.77E-22    |
| <i>Abl2</i>                       | V-abl Abelson murine leukemia viral oncogene 2                   | <i>abl2</i>             | 4.51                          | 6.82E-46    |
| <i>Bcar1</i>                      | Breast cancer anti-estrogen resistance 1                         | <i>bcar1</i>            | 2.46                          | 1.26E-09    |
| <i>Src</i>                        | Rous sarcoma oncogene                                            | <i>src</i>              | 2.15                          | 9.01E-07    |
| <i>Ptprf</i>                      | Protein tyrosine phosphatase, receptor type, F                   | <i>ptprfb</i>           | 1.71                          | 2.15E-05    |
| <i>Itga1</i>                      | Integrin alpha 1                                                 | <i>itga1</i>            | 1.63                          | 7.27E-04    |
| <i>Egfr</i>                       | Epidermal growth factor receptor                                 | <i>egfra</i>            | 1.06                          | 1.33E-02    |
| <i>Abl1</i>                       | C-abl oncogene 1, non-receptor tyrosine kinase                   | <i>abl1</i>             | 1.05                          | 3.19E-02    |
| <i>PI3K-Akt signaling pathway</i> |                                                                  |                         |                               |             |
| <i>Pck1</i>                       | Phosphoenolpyruvate carboxykinase 1, cytosolic                   | <i>pck1</i>             | 5.81                          | 3.98E-39    |
| <i>Pdgfrb</i>                     | Platelet derived growth factor receptor, beta polypeptide        | <i>pdgfrb</i>           | 5.02                          | 4.38E-22    |
| <i>Efnal</i>                      | Ephrin A1                                                        | <i>efnalb</i>           | 4.34                          | 1.65E-32    |
| <i>Pkn1</i>                       | Protein kinase N1                                                | <i>pkn1</i>             | 2.81                          | 1.52E-11    |
| <i>Atf4</i>                       | Activating transcription factor 4                                | <i>atf4b2</i>           | 2.40                          | 3.99E-10    |
| <i>Pik3r1</i>                     | Phosphatidylinositol 3-kinase, regulatory subunit, polypeptide 1 | <i>pik3r1</i>           | 1.87                          | 7.21E-06    |
| <b><i>Pten</i></b>                | Phosphatase and tensin homolog                                   | <i>ptena</i>            | 1.81                          | 8.06E-06    |
| <b><i>Cdkn1b</i><sup>a</sup></b>  | Cyclin-dependent kinase inhibitor 1B                             | <i>cdkn1ba</i>          | 1.06                          | 2.58E-02    |
| <i>Wnt signaling</i>              |                                                                  |                         |                               |             |
| <b><i>Foxo3</i></b>               | Forkhead box O3                                                  | <i>foxo3b</i>           | 3.74                          | 2.72E-13    |
| <b><i>Dab2ip</i></b>              | Disabled 2 interacting protein                                   | <i>dab2ipb</i>          | 3.58                          | 1.46E-14    |
| <b><i>Foxo1</i></b>               | Forkhead box O1                                                  | <i>foxo1a</i>           | 2.31                          | 4.31E-06    |
| <b><i>Dapk3</i></b>               | Death-associated protein kinase 3                                | <i>dapk3</i>            | 2.09                          | 1.49E-09    |
| <i>Smad3</i>                      | SMAD family member 3                                             | <i>smad3a</i>           | 2.02                          | 1.34E-05    |
| <i>Wnt7b</i>                      | Wingless-type MMTV integration site family, member 7B            | <i>wnt7ba</i>           | 1.93                          | 4.00E-03    |
| <i>Fzd5</i>                       | Frizzled homolog 5                                               | <i>fzd5</i>             | 1.75                          | 6.60E-06    |
| <b><i>Sfrp1</i></b>               | Secreted frizzled-related protein 1                              | <i>sfrp1b</i>           | 1.72                          | 2.49E-06    |
| <b><i>Axin2</i></b>               | Axis inhibition protein 2                                        | <i>axin2</i>            | 1.03                          | 7.34E-03    |
| <i>Response to hypoxia</i>        |                                                                  |                         |                               |             |
| <b><i>Hif1a</i></b>               | Hypoxia inducible factor 1, alpha subunit                        | <i>hif1al</i>           | 3.69                          | 1.43E-12    |
| <i>Ddit4</i>                      | DNA-damage-inducible transcript 4                                | <i>ddit4</i>            | 3.40                          | 1.40E-16    |
| <i>Ucp2</i>                       | Uncoupling protein 2                                             | <i>ucp2</i>             | 3.17                          | 5.06E-21    |
| <i>Pdk3</i>                       | Pyruvate dehydrogenase kinase, isoenzyme 3                       | <i>pdk3a</i>            | 2.09                          | 1.44E-07    |
| <i>Ppard</i>                      | Peroxisome proliferator activator receptor delta                 | <i>pparda</i>           | 2.04                          | 1.70E-04    |
| <i>Itpr2</i>                      | Inositol 1,4,5-triphosphate receptor 2                           | <i>itpr2</i>            | 1.74                          | 1.45E-05    |
| <i>Flt1</i>                       | FMS-like tyrosine kinase 1                                       | <i>flt1</i>             | 1.29                          | 1.83E-04    |

Table 3. continued

| gene symbol (mouse)        | gene title                                                                          | gene symbol (zebrafish) | log2 Fold Change | FDR p-value |
|----------------------------|-------------------------------------------------------------------------------------|-------------------------|------------------|-------------|
| <i>Edn1</i>                | Endothelin 1                                                                        | <i>edn1</i>             | 1.19             | 3.74E-02    |
| <i>Kdr</i>                 | Kinase insert domain protein receptor                                               | <i>kdr</i>              | 1.05             | 3.48E-03    |
| <i>NF-kappaB signaling</i> |                                                                                     |                         |                  |             |
| <i>Nfkbia</i>              | Nuclear factor of kappa light polypeptide gene enhancer in B cells inhibitor, alpha | <i>nfkbiab</i>          | 2.86             | 3.28E-10    |
| <i>Hmox1</i>               | Heme oxygenase 1                                                                    | <i>hmox1a</i>           | 2.79             | 2.29E-06    |
| <i>Fbxw11</i>              | F-box and WD-40 domain protein 11                                                   | <i>fbxw11a</i>          | 1.99             | 1.06E-06    |
| <b><i>Casp8</i></b>        | Caspase 8                                                                           | <i>casp8l2</i>          | 1.94             | 6.32E-04    |
| <i>Rela</i>                | V-rel reticuloendotheliosis viral oncogene homolog A (avian)                        | <i>rela</i>             | 1.51             | 3.93E-04    |
| <i>Tlr3</i>                | Toll-like receptor 3                                                                | <i>tlr3</i>             | 1.46             | 9.97E-05    |

- a. Bold indicates tumor suppressor.
- b. Changes in gene expression were based on log2 fold of the expression in wildtype relative to those in Pgr-KO. Genes were listed by fold change within each shared type in each category.



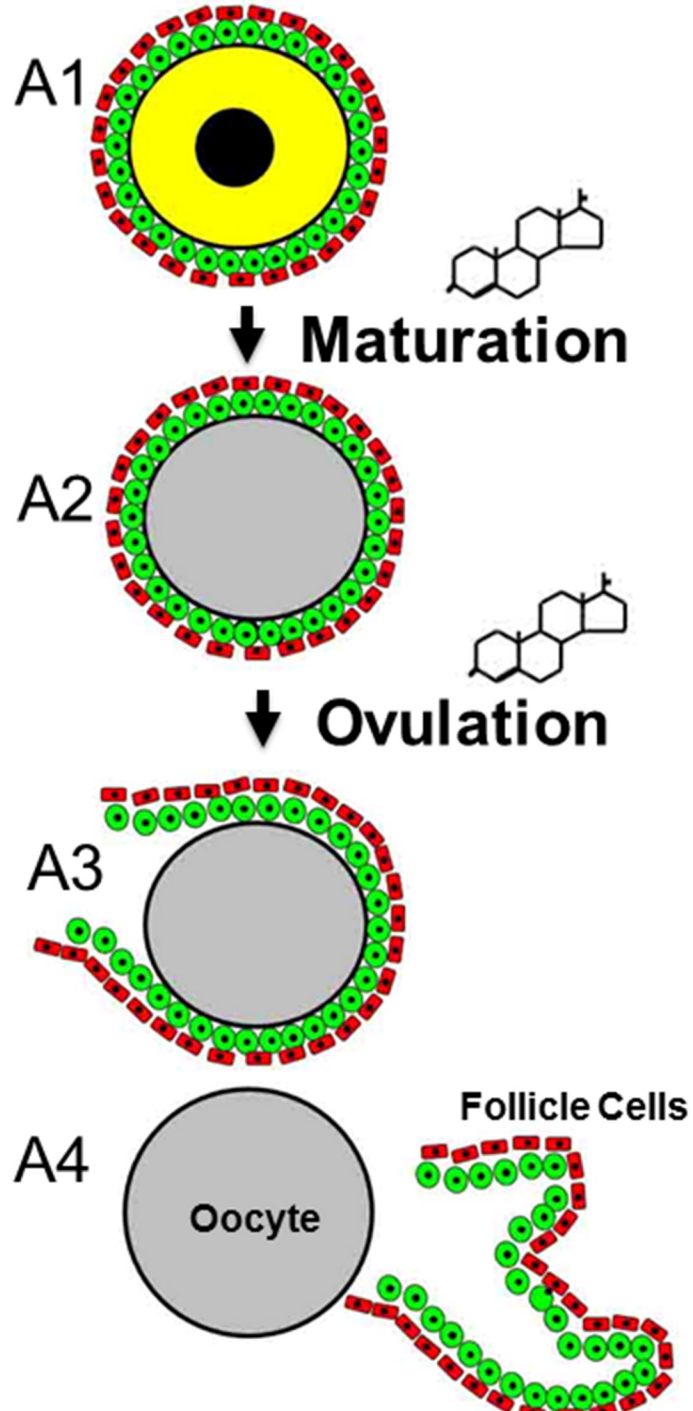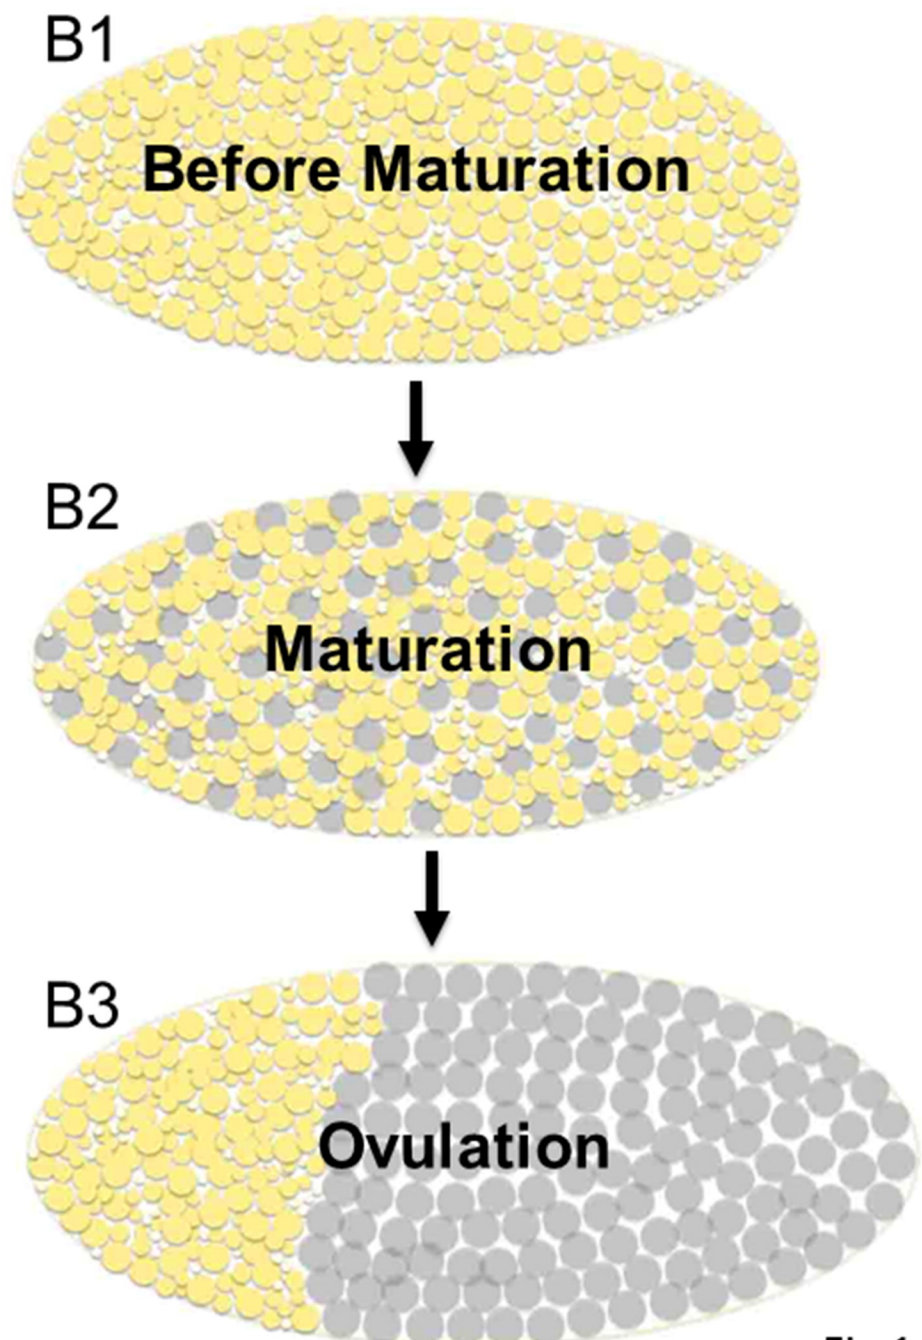

Fig.1

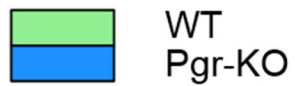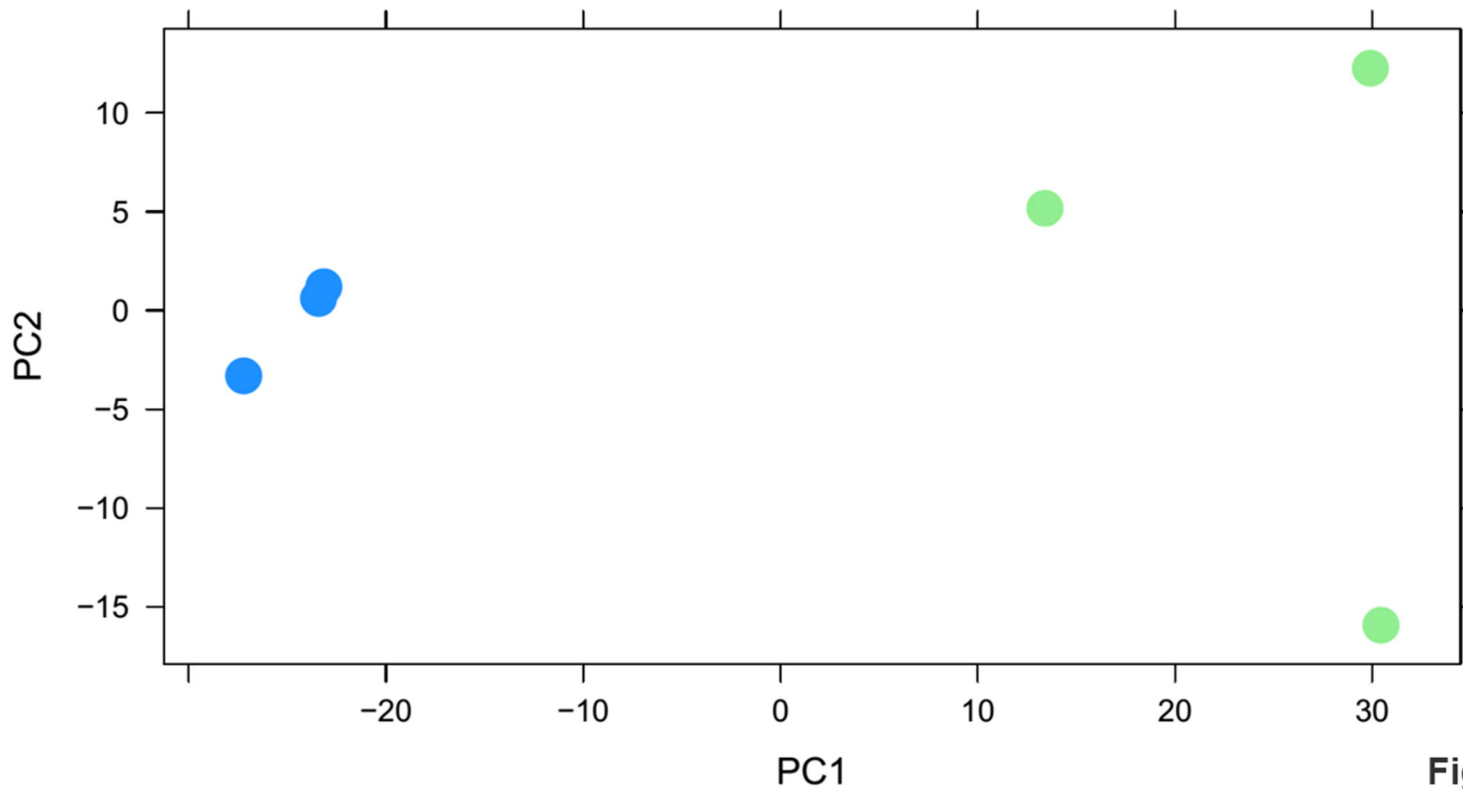

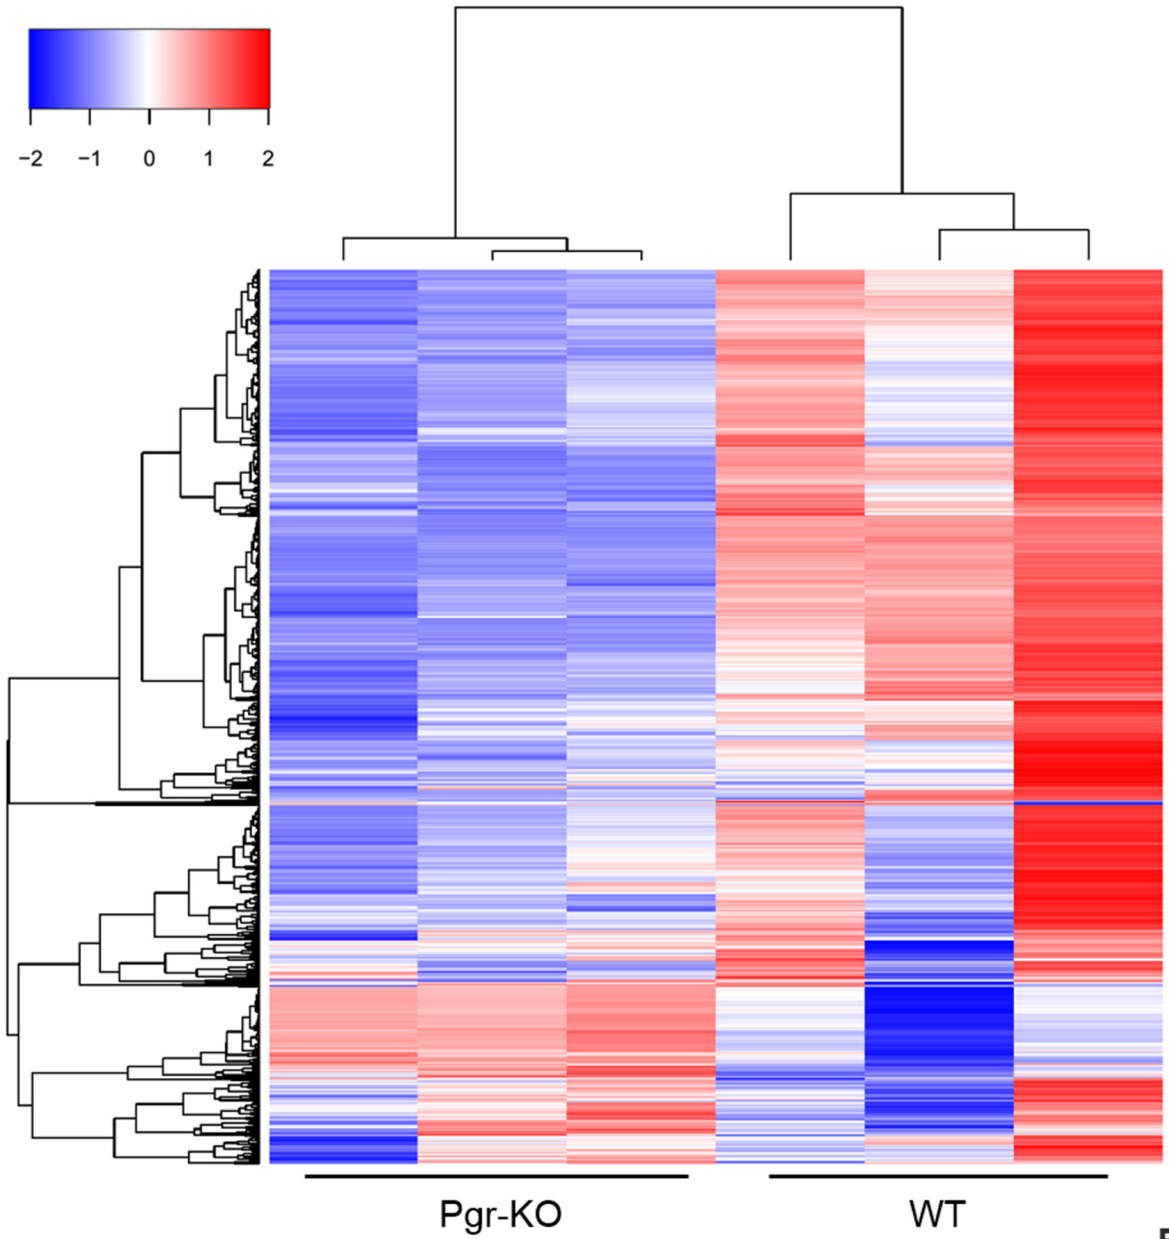

Fig.3

## DE Genes Distribution

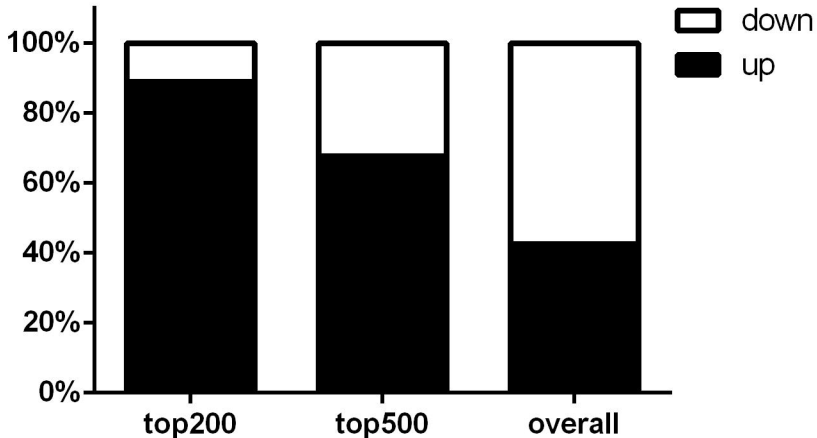

Fig.4

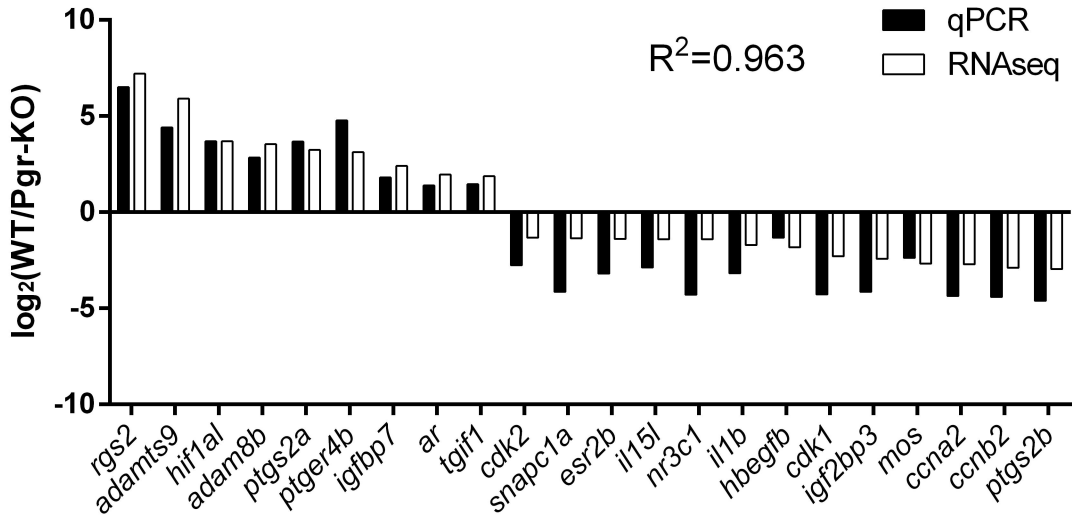

fig.5



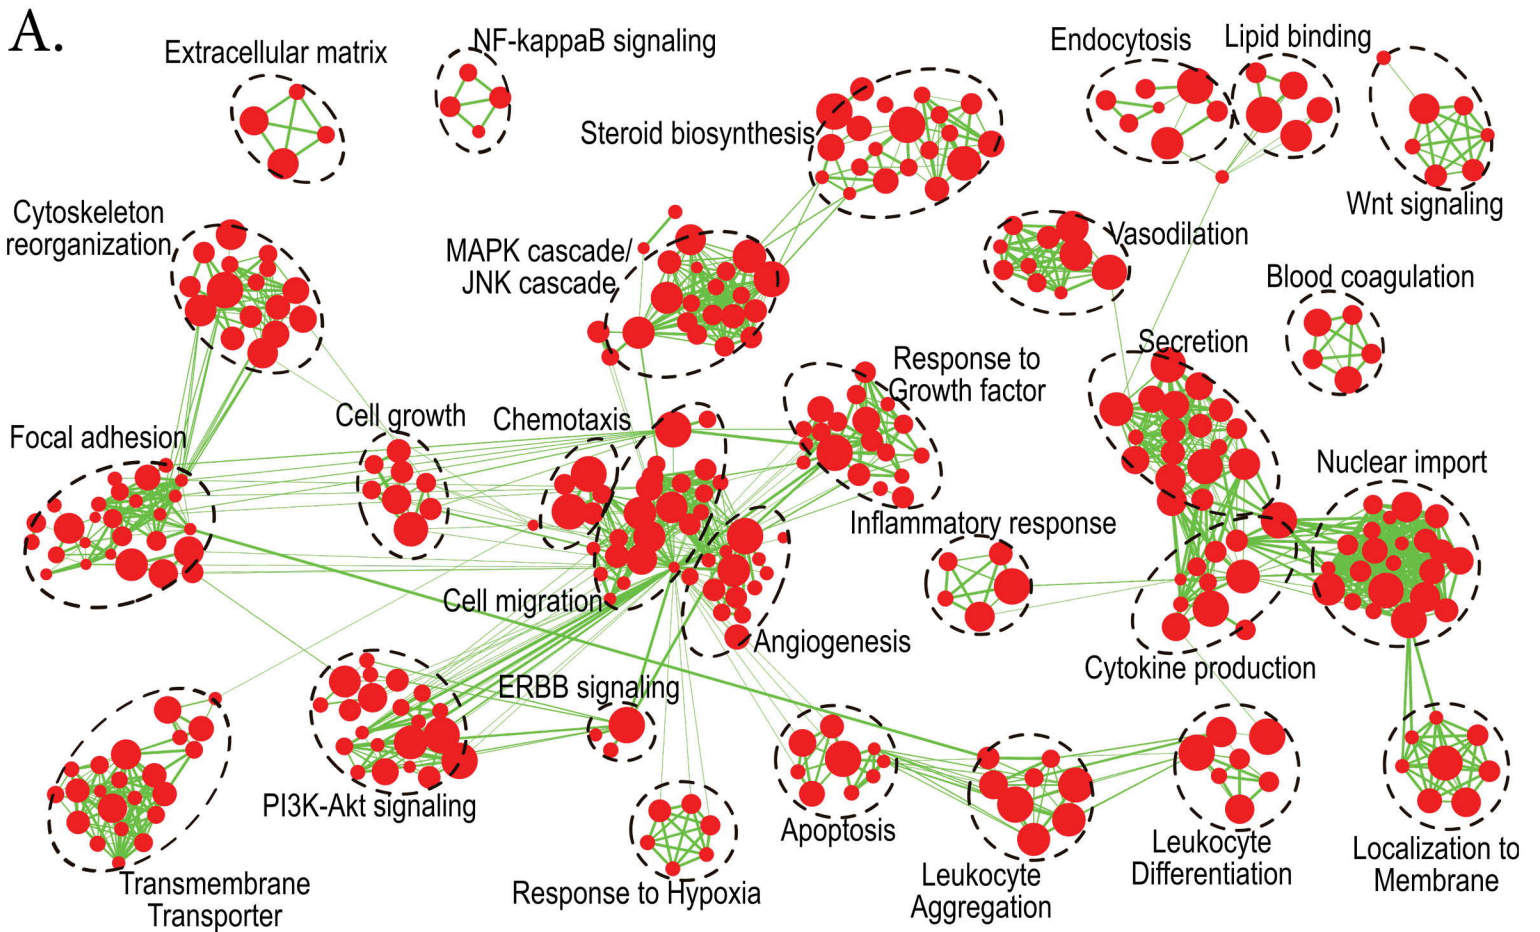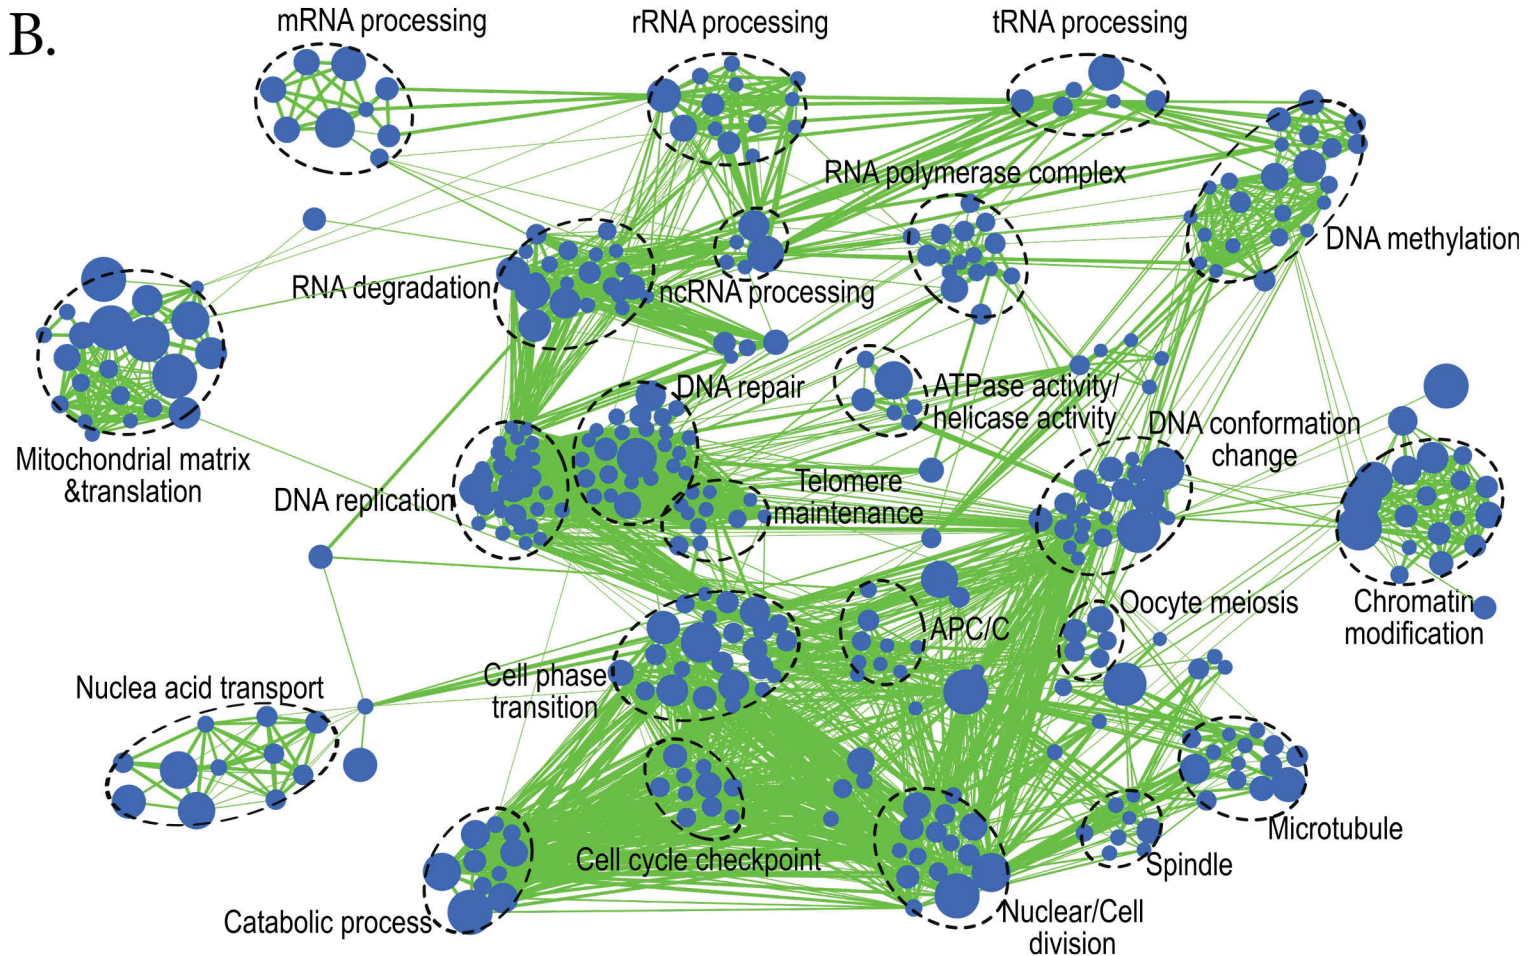



**A.**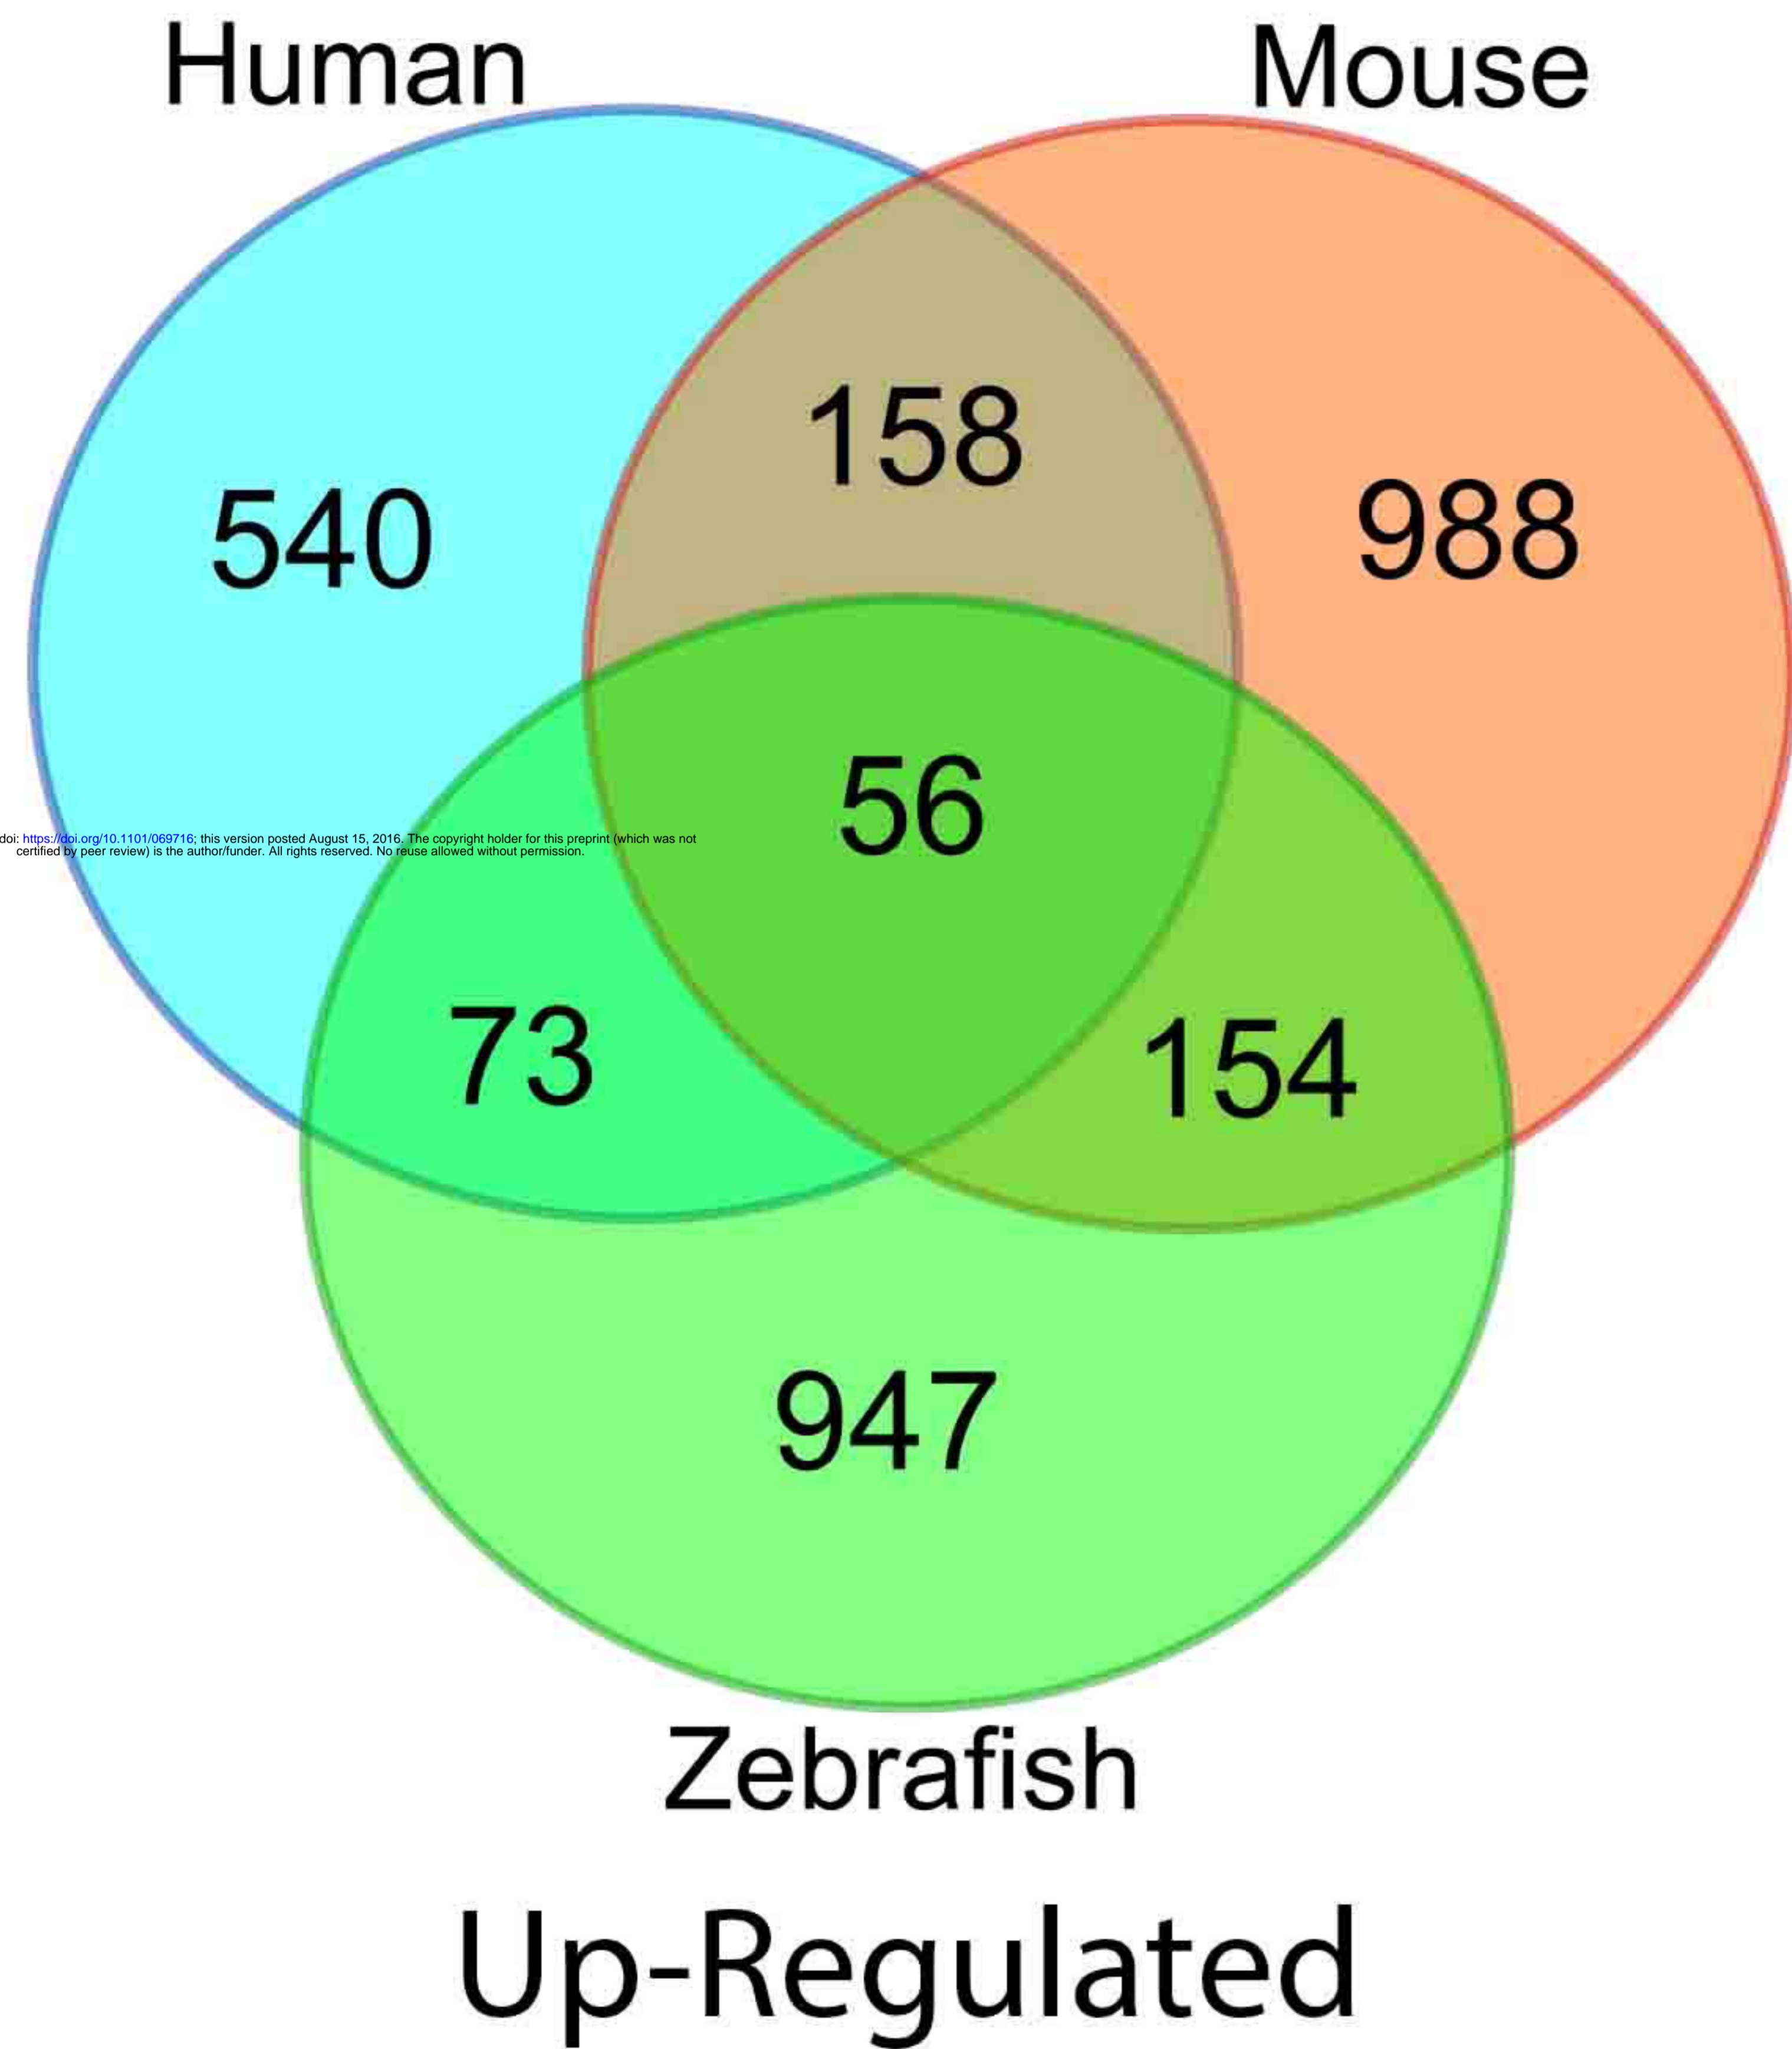**B.**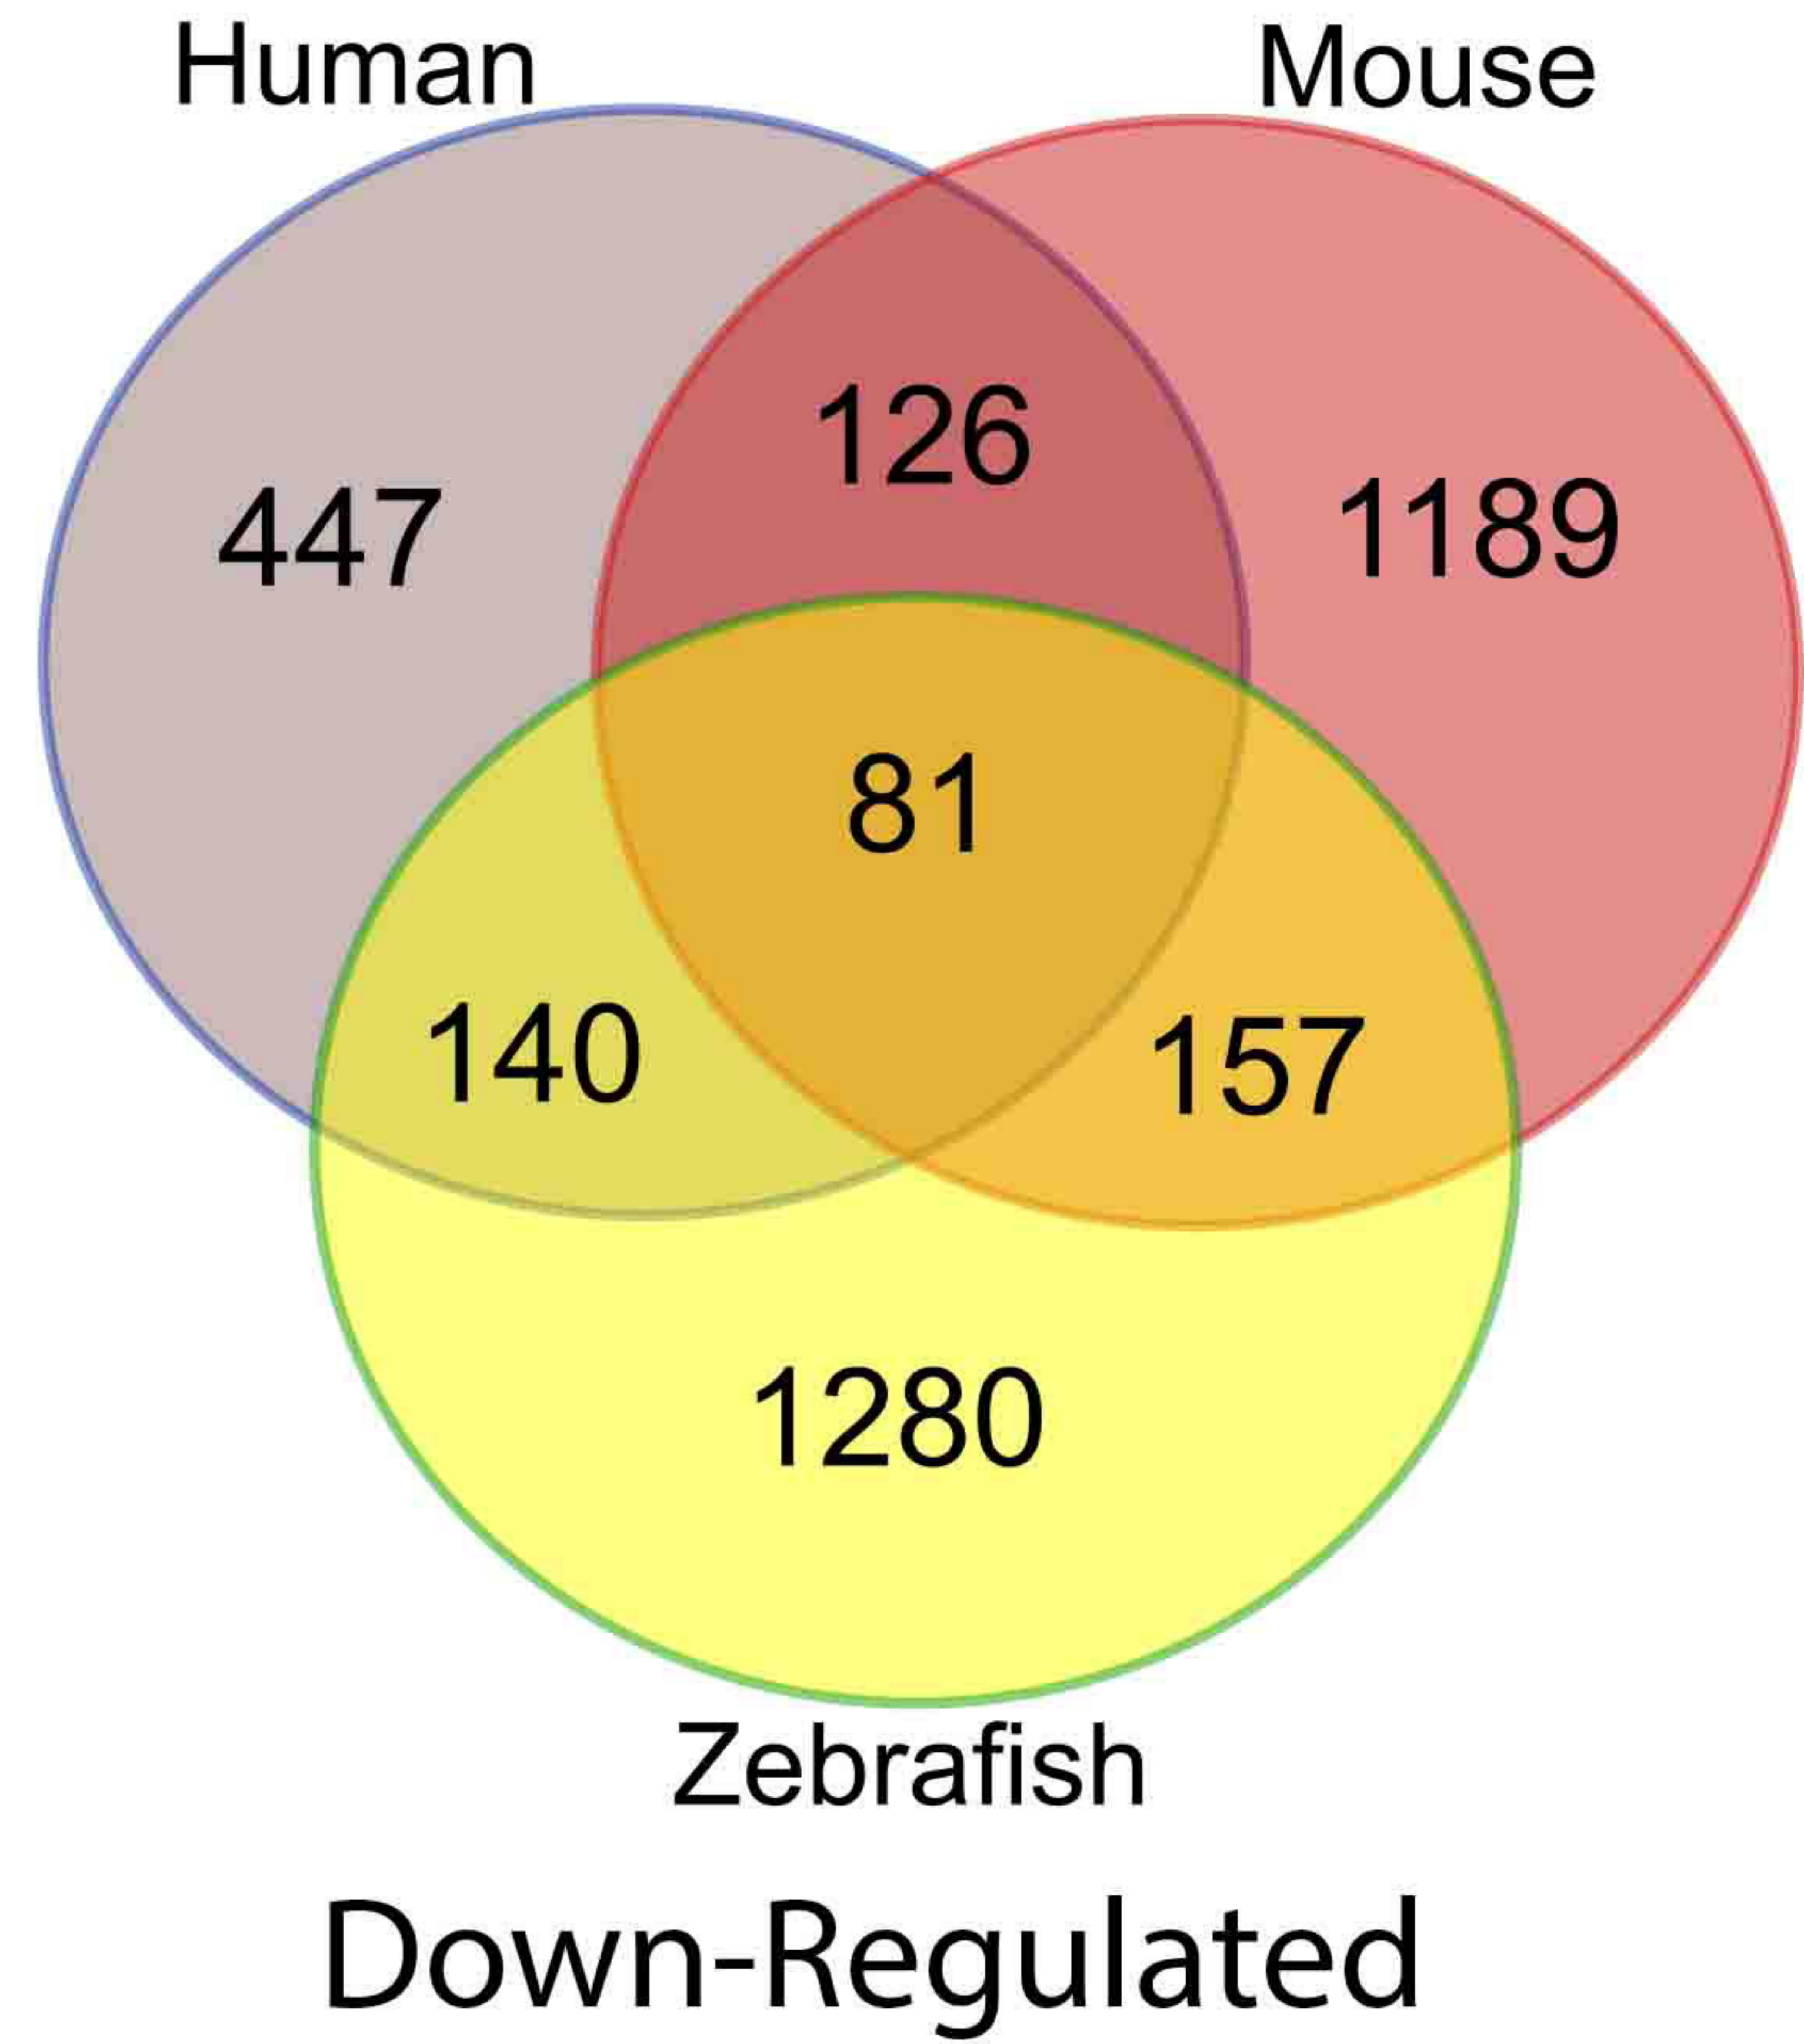



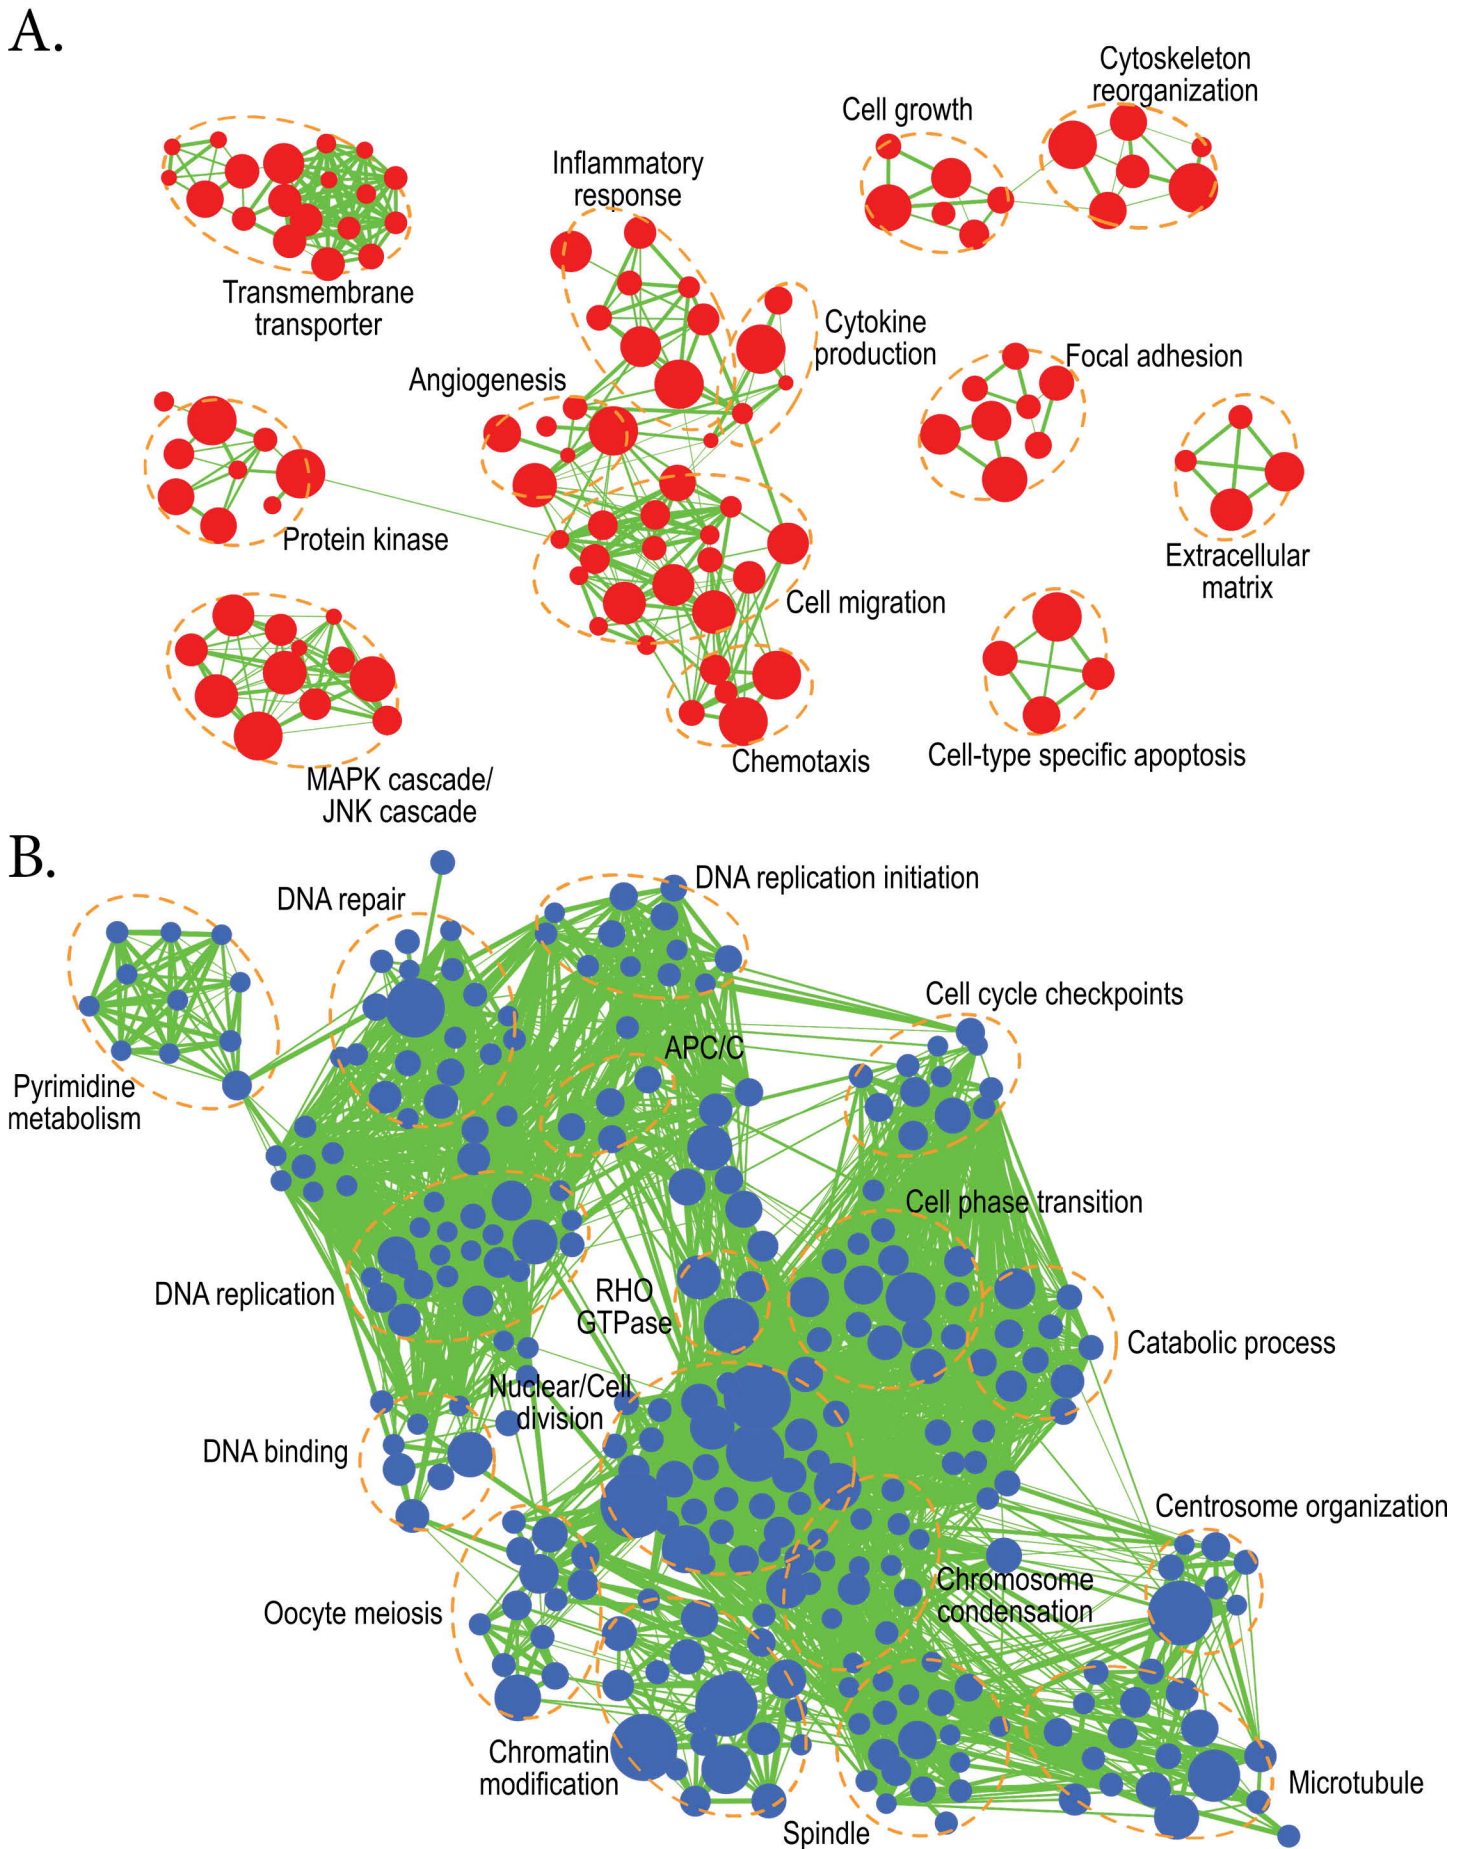

Source: https://www.biorxiv.org/content/10.1101/069716v1.full.pdf
